# Supplementary material
Source: PubMed Central journal article supplement (PMC4863200)
Supplement: om6b00051_si_001.pdf [file om6b00051_si_001.pdf]

# Titanocene-gold complexes containing N-heterocyclic carbene ligands inhibit growth of prostate, renal and colon cancers *in vitro*

Yiu Fung Mui,<sup>a,b#</sup> Jacob Fernández-Gallardo,<sup>a#</sup> Benelita T. Elie,<sup>a,c</sup> Ahmed Gubran,<sup>a</sup> Irene Maluenda,<sup>d</sup> Mercedes Sanaú,<sup>c</sup> Oscar Navarro,<sup>d</sup> and María Contel<sup>\*a,b,c</sup>

<sup>a</sup>Department of Chemistry, Brooklyn College, The City University of New York, Brooklyn, NY, 11210, US.

<sup>b</sup>Chemistry and <sup>c</sup>Biology PhD Programs, The Graduate Center, The City University of New York, 365 Fifth Avenue, New York, NY, 10016, US. <sup>d</sup>Department of Chemistry, University of Sussex, Falmer, Brighton BN1 9QJ, U.K.

<sup>c</sup>Departamento de Química Inorgánica, Universidad de Valencia, Burjassot, Valencia, 46100, Spain.

\*Email: MariaContel@brooklyn.cuny.edu

## Supporting Information

### Table of Contents

|                                                                                                                                                        |     |
|--------------------------------------------------------------------------------------------------------------------------------------------------------|-----|
| 1. NMR spectra of all compounds in CDCl <sub>3</sub> .....                                                                                             | S2  |
| 2. NMR spectra of decomposition of compounds <b>5a-d</b> in DMSO- <i>d</i> <sub>6</sub> and in DMSO- <i>d</i> <sub>6</sub> /PBS-D <sub>2</sub> O ..... | S10 |
| 3. MS ESI+ spectra of all compounds and theoretical isotopic distributions of relevant peaks .....                                                     | S14 |
| 4. Solid state IR spectra of all compounds .....                                                                                                       | S18 |
| 5. UV-visible spectra of compounds <b>4a-d</b> and <b>5a-d</b> in dichloromethane .....                                                                | S22 |
| 6. Crystallographic data for compound <b>4c</b> .....                                                                                                  | S26 |
| 7. DFT Studies for compounds <b>4a-d</b> and <b>5a-d</b> .....                                                                                         | S29 |
| 7.1. Computational details and structures .....                                                                                                        | S29 |
| 7.2. Calculated IR spectra of compounds <b>4a-d</b> and <b>5a-d</b> .....                                                                              | S30 |
| 8. Interaction of monometallic gold compounds ( <b>4a-d</b> ) with plasmid pBR322 DNA .....                                                            | S34 |
| 9. Migration assays with compounds <b>4a</b> and <b>4c</b> .....                                                                                       | S34 |
| 10. Inhibition of Thioredoxin Reductase (TrxR) studies of Titanocene Y at 5 and 24h .....                                                              | S35 |

1. NMR spectra of all compounds in CDCl<sub>3</sub>

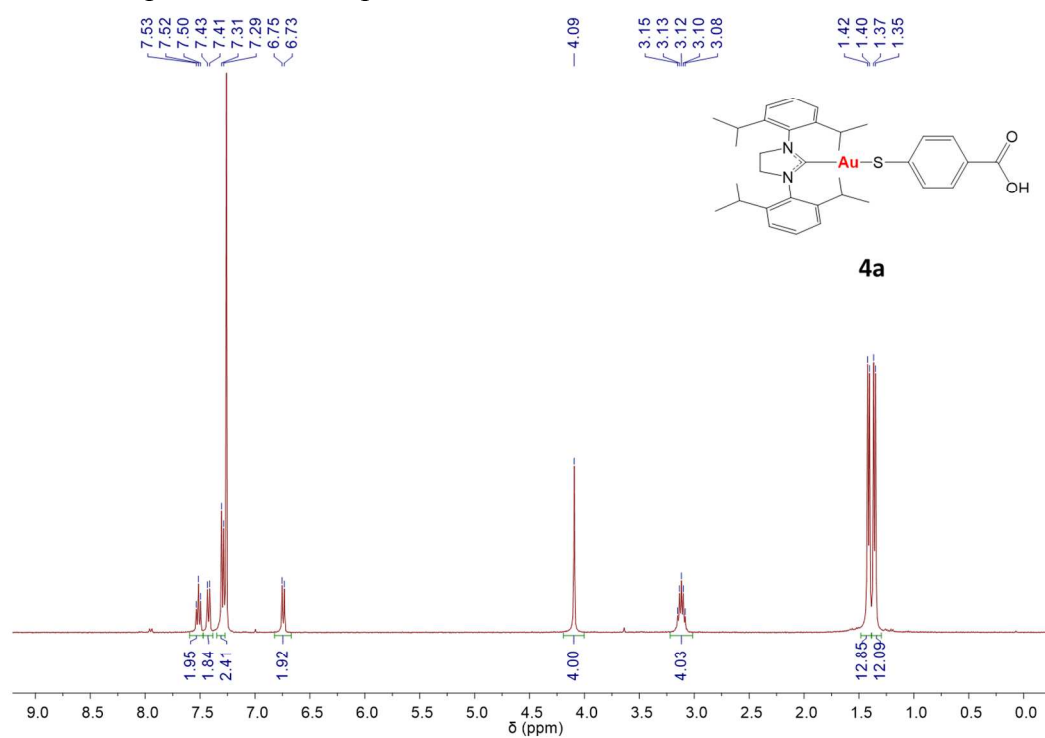

**Figure S1.** <sup>1</sup>H NMR spectrum of compound **4a** in CDCl<sub>3</sub>.

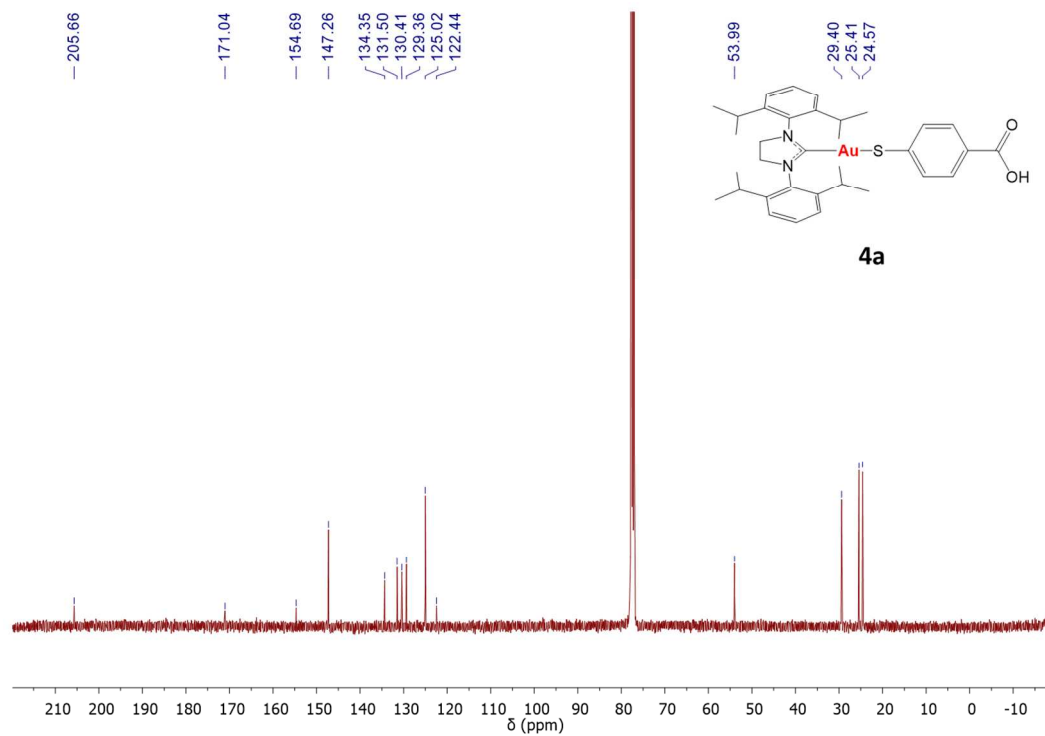

**Figure S2.** <sup>13</sup>C {<sup>1</sup>H} NMR spectrum of compound **4a** in CDCl<sub>3</sub>.

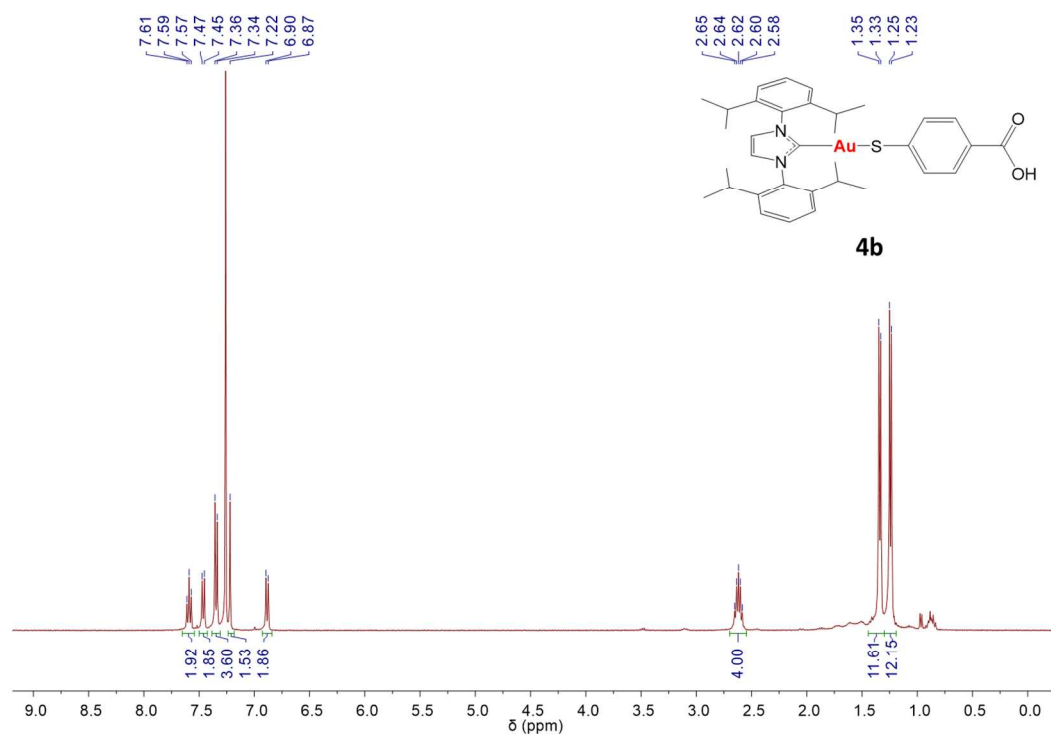

**Figure S3.**  $^1\text{H}$  NMR spectrum of compound **4b** in  $\text{CDCl}_3$ .

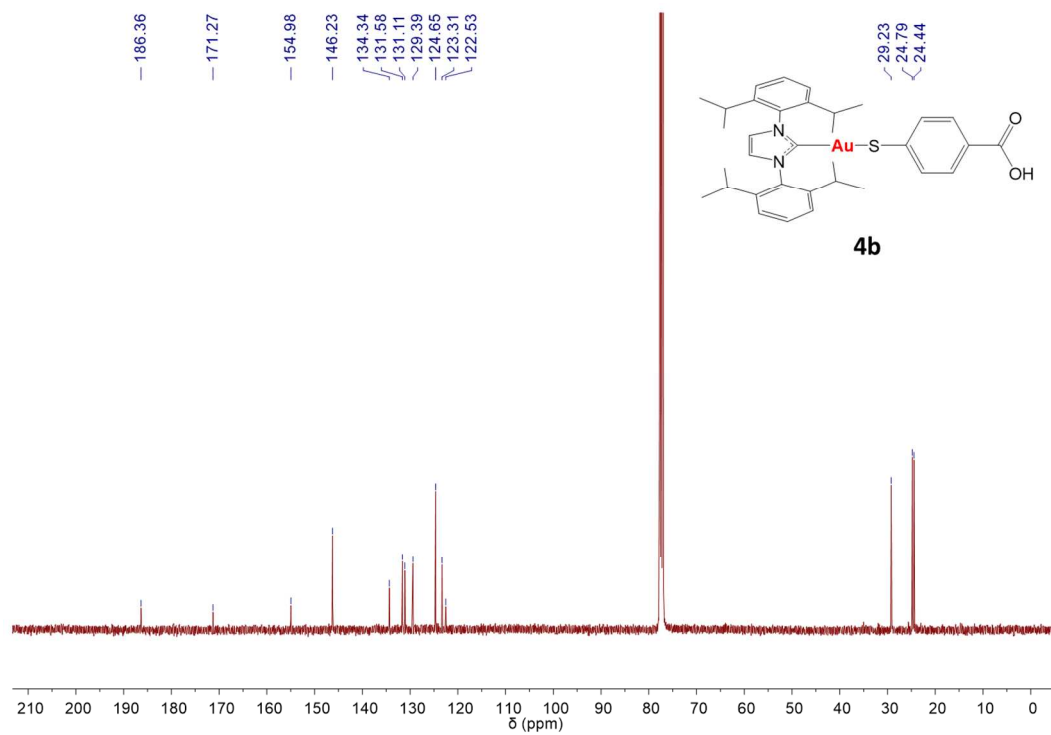

**Figure S4.**  $^{13}\text{C}\{^1\text{H}\}$  NMR spectrum of compound **4b** in  $\text{CDCl}_3$ .

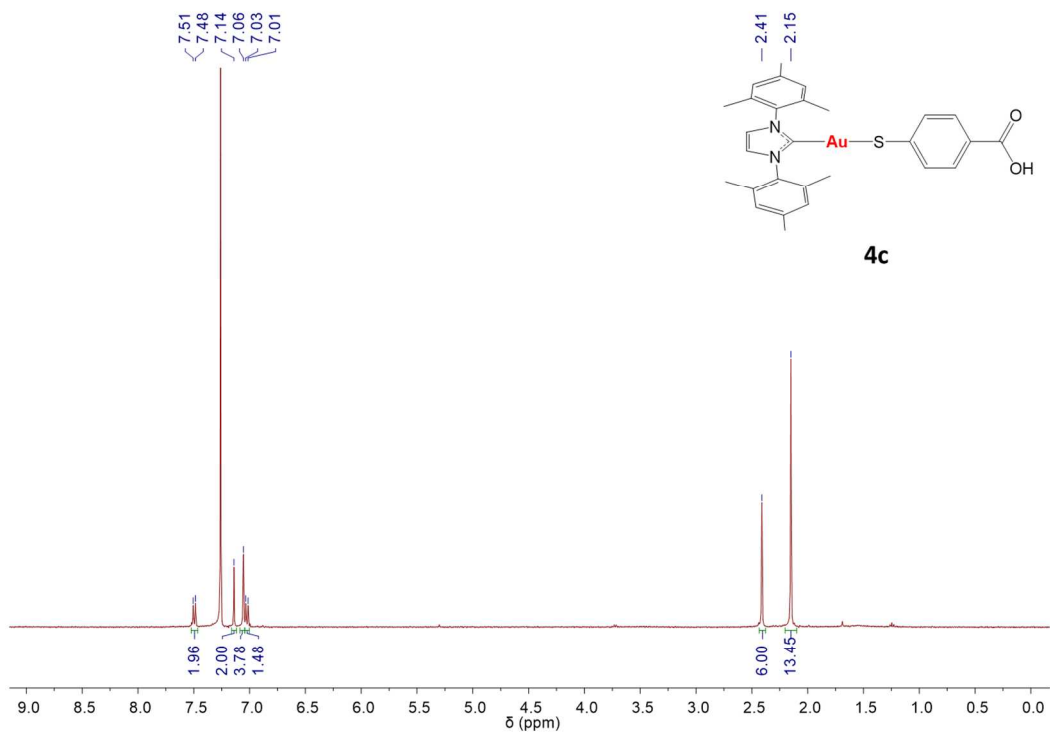

Figure S5.  $^1\text{H}$  NMR spectrum of compound **4c** in  $\text{CDCl}_3$ .

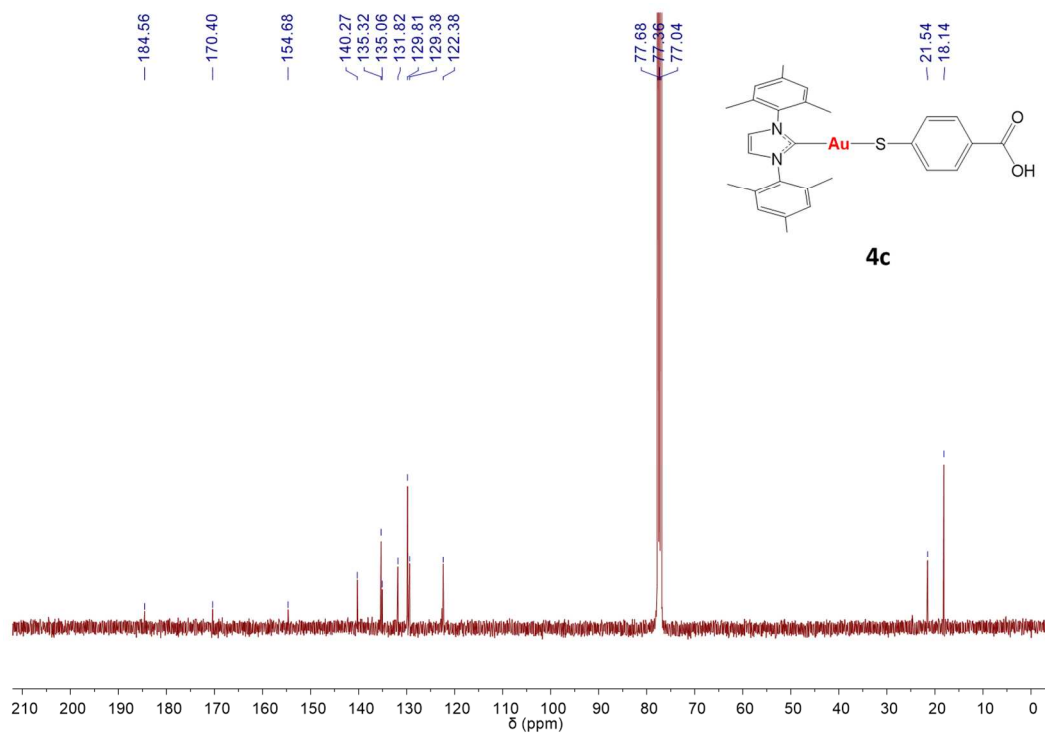

Figure S6.  $^{13}\text{C}\{^1\text{H}\}$  NMR spectrum of compound **4c** in  $\text{CDCl}_3$ .

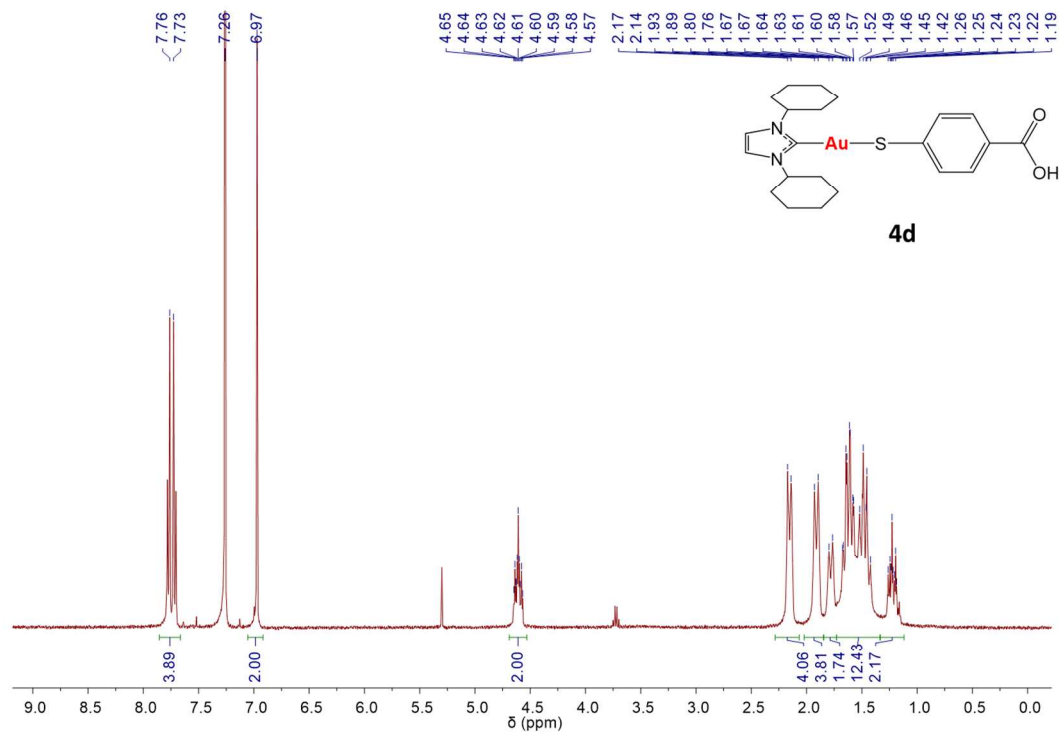

Figure S7.  $^1\text{H}$  NMR spectrum of compound **4d** in  $\text{CDCl}_3$ .

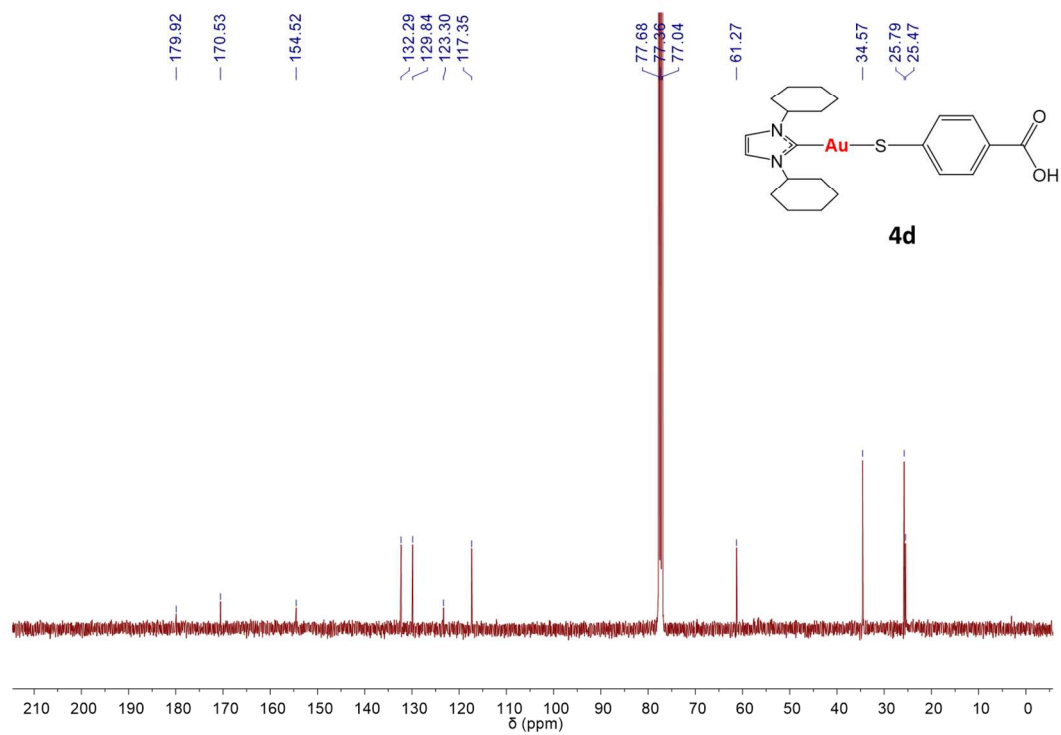

Figure S8.  $^{13}\text{C}\{^1\text{H}\}$  NMR spectrum of compound **4d** in  $\text{CDCl}_3$ .

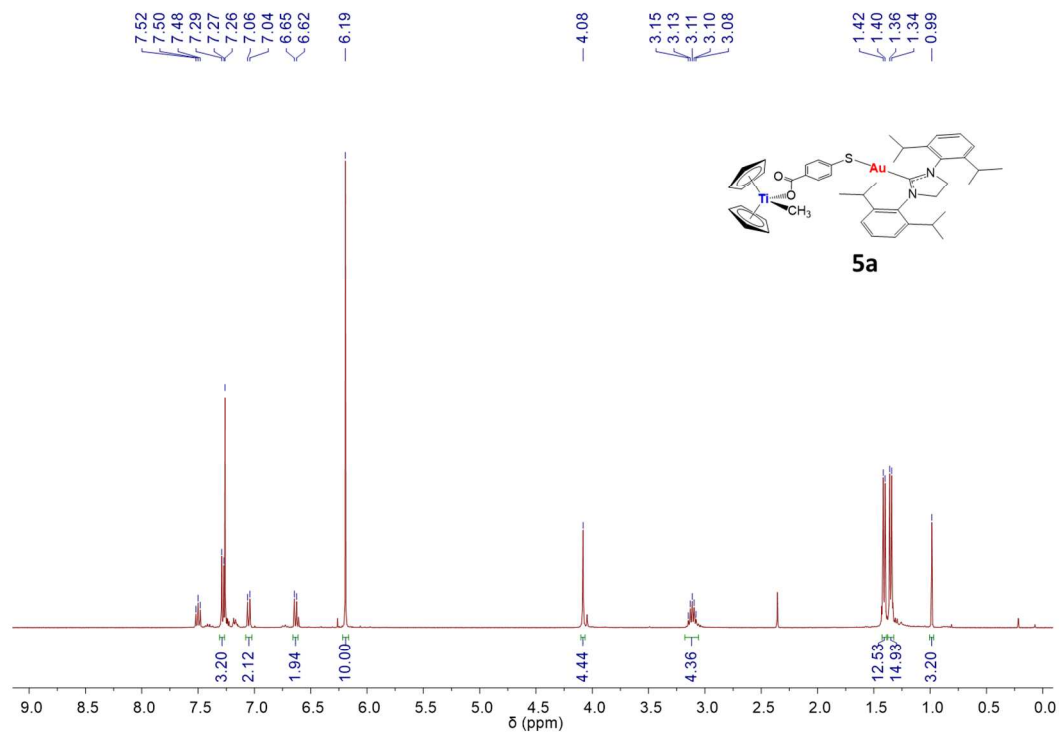

**Figure S9.**  $^1\text{H}$  NMR spectrum of compound **5a** in  $\text{CDCl}_3$ .

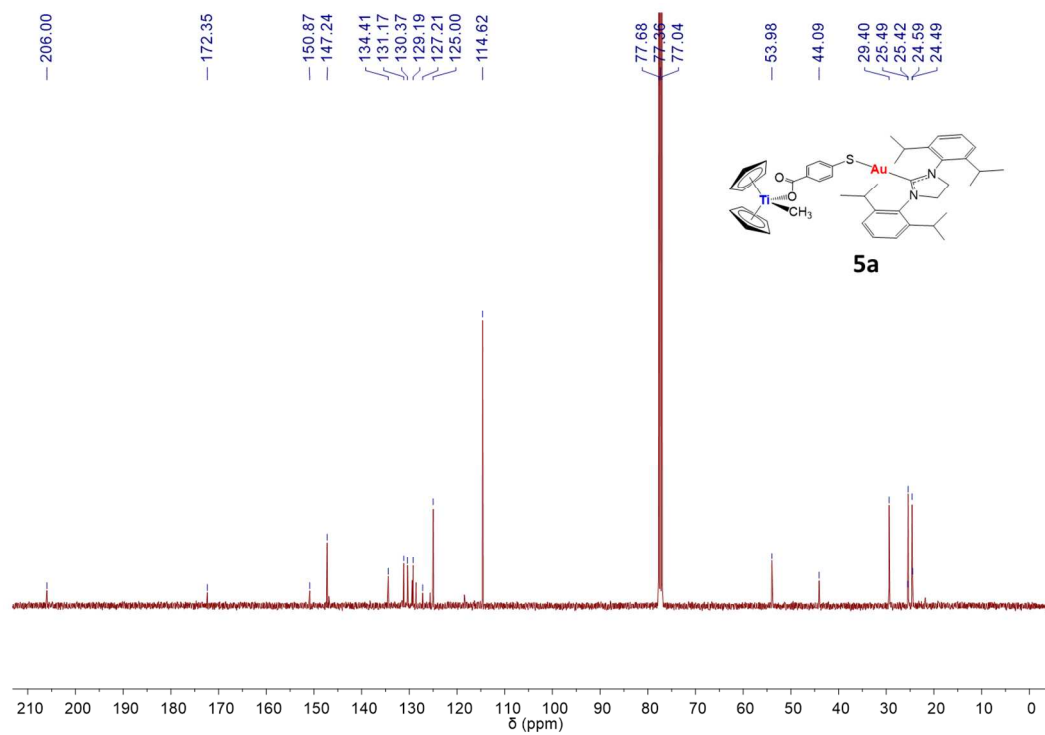

**Figure S10.**  $^{13}\text{C}\{^1\text{H}\}$  NMR spectrum of compound **5a** in  $\text{CDCl}_3$ .

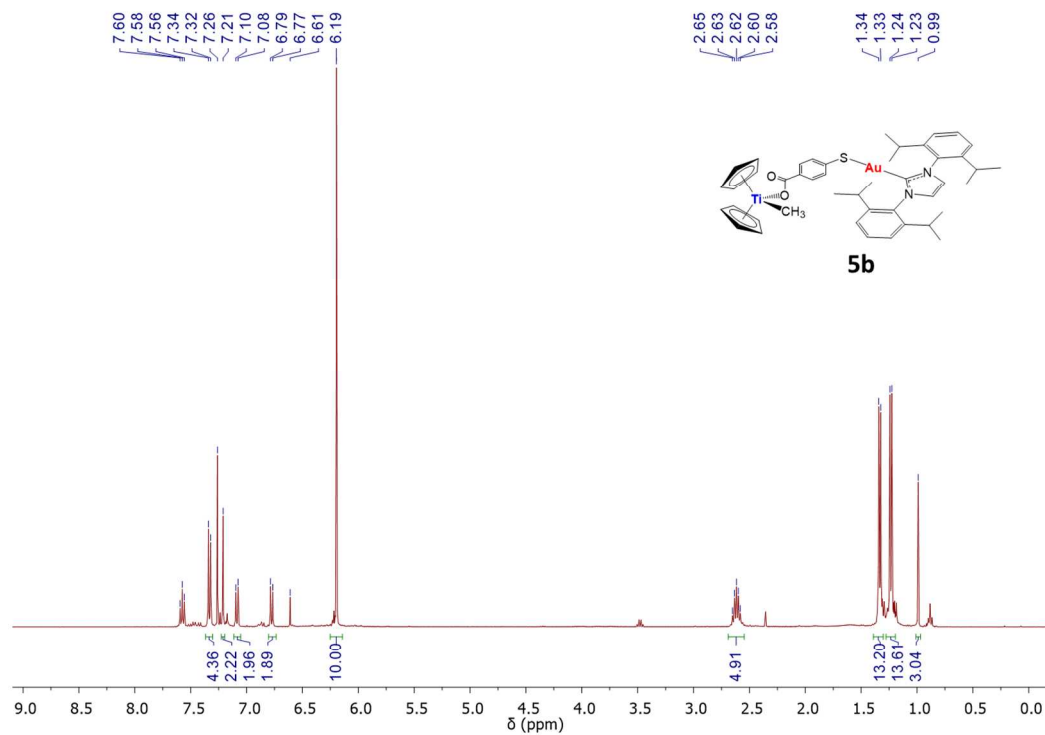

Figure S11. <sup>1</sup>H NMR spectrum of compound **5b** in CDCl<sub>3</sub>.

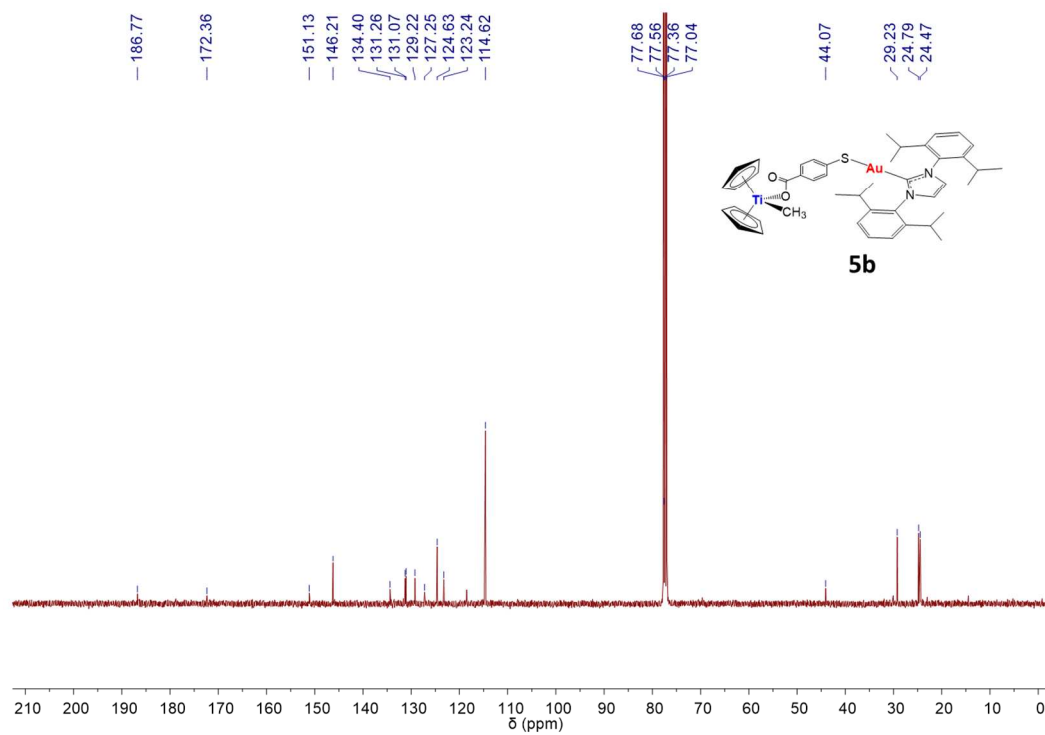

Figure S12. <sup>13</sup>C{<sup>1</sup>H} NMR spectrum of compound **5b** in CDCl<sub>3</sub>.

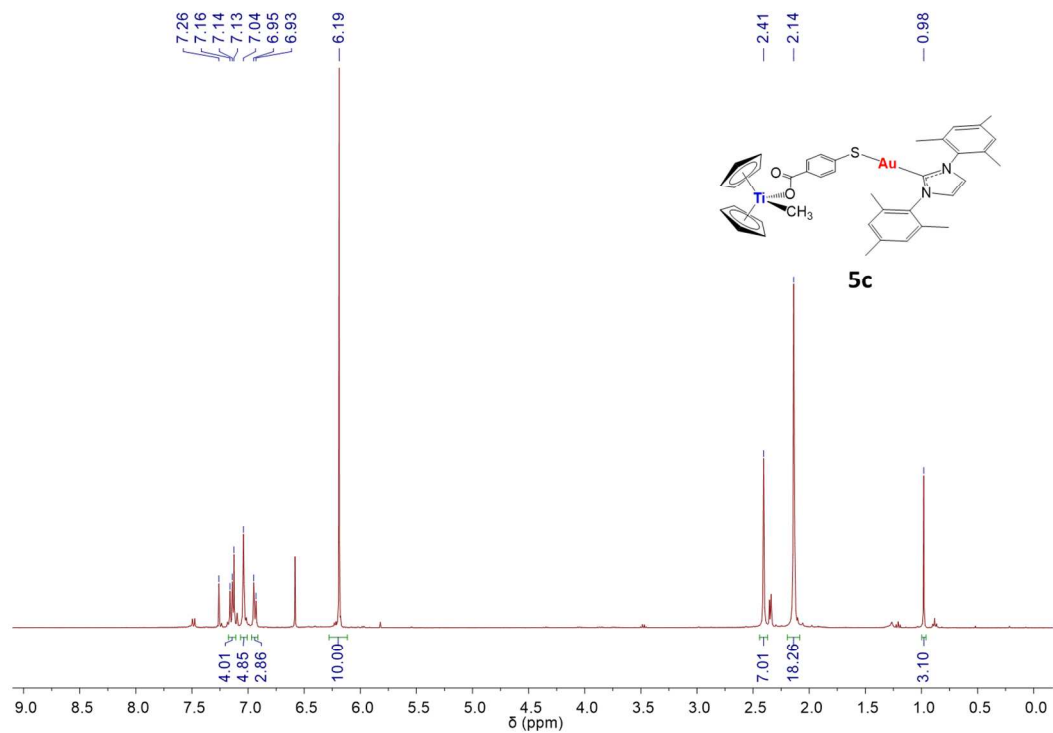

**Figure S13.**  $^1\text{H}$  NMR spectrum of compound **5c** in  $\text{CDCl}_3$ .

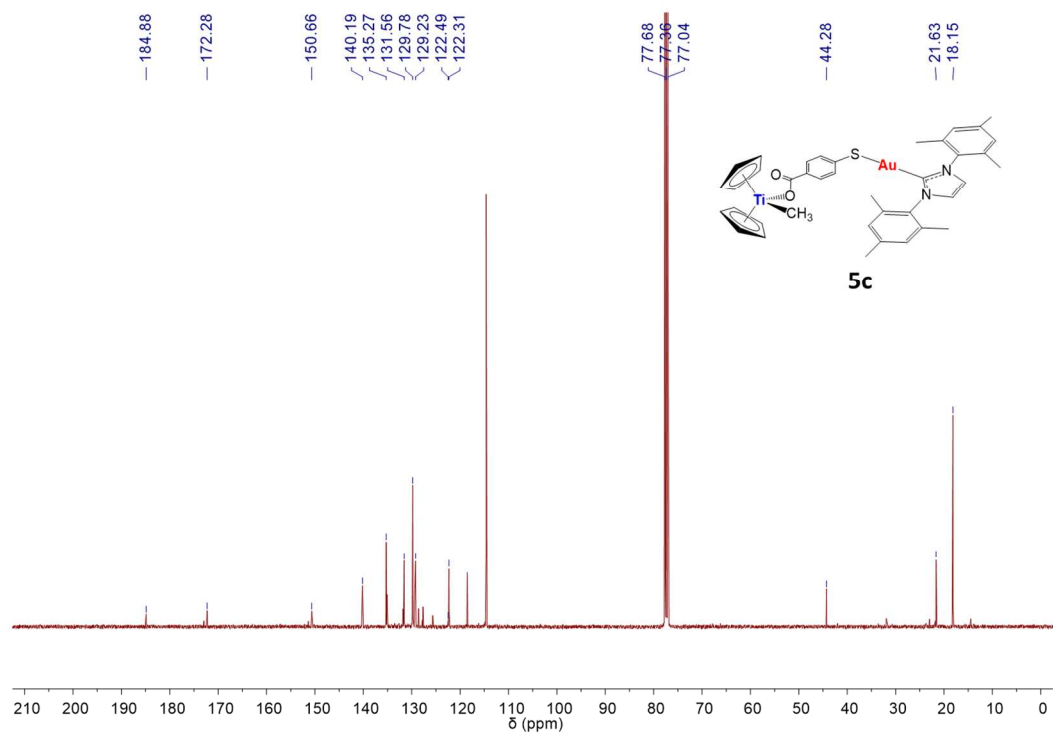

**Figure S14.**  $^{13}\text{C}\{^1\text{H}\}$  NMR spectrum of compound **5c** in  $\text{CDCl}_3$ .





2. NMR spectra of decomposition of compounds **5a-d** in DMSO-*d*<sub>6</sub> and in DMSO-*d*<sub>6</sub>/PBS-D<sub>2</sub>O

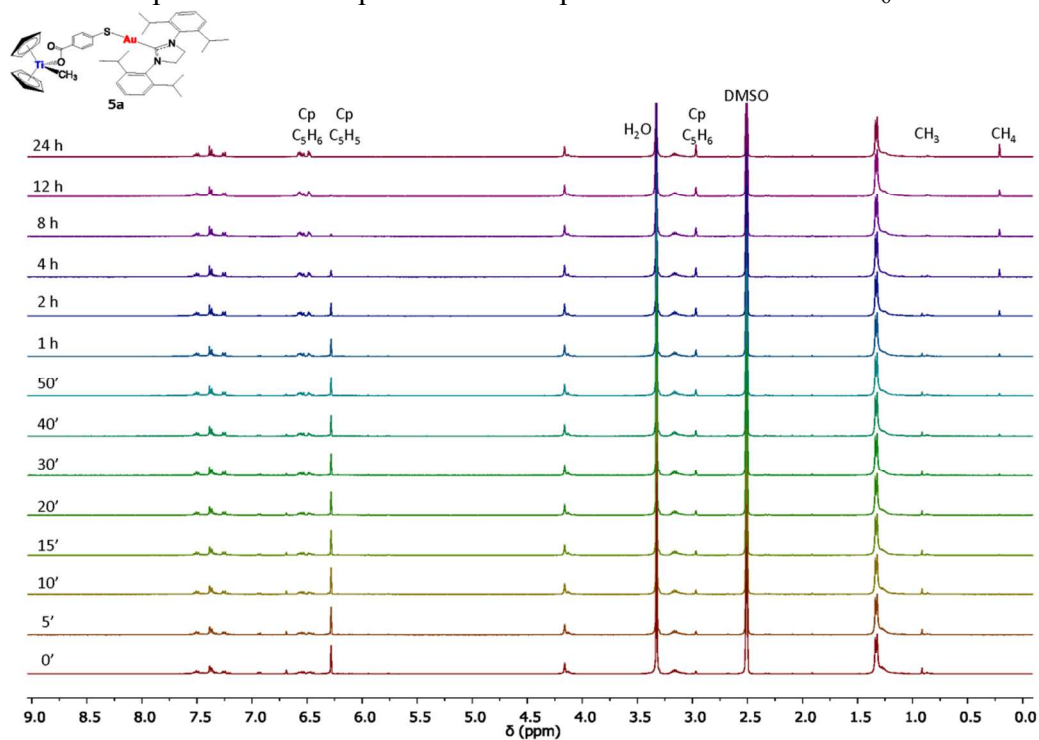

Figure S17. Time course <sup>1</sup>H NMR spectrum in DMSO-*d*<sub>6</sub> of compound **5a**.  $t_{1/2} = 1$ h.

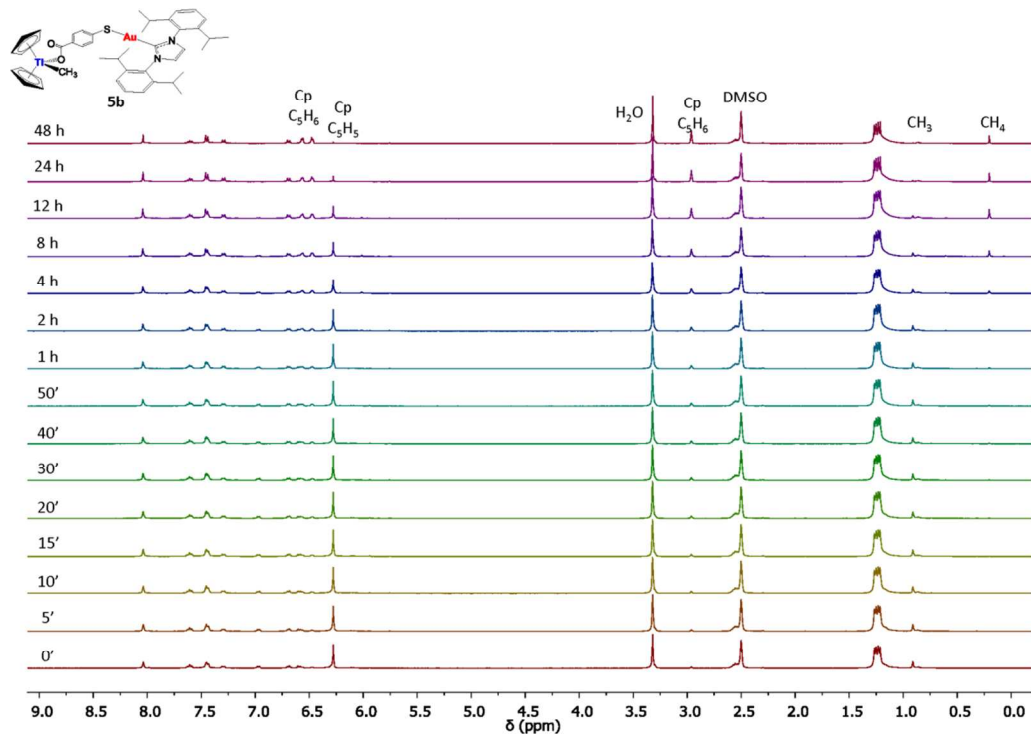

Figure S18. Time course <sup>1</sup>H NMR spectrum in DMSO-*d*<sub>6</sub> of compound **5b**.  $t_{1/2} = 3$ h.

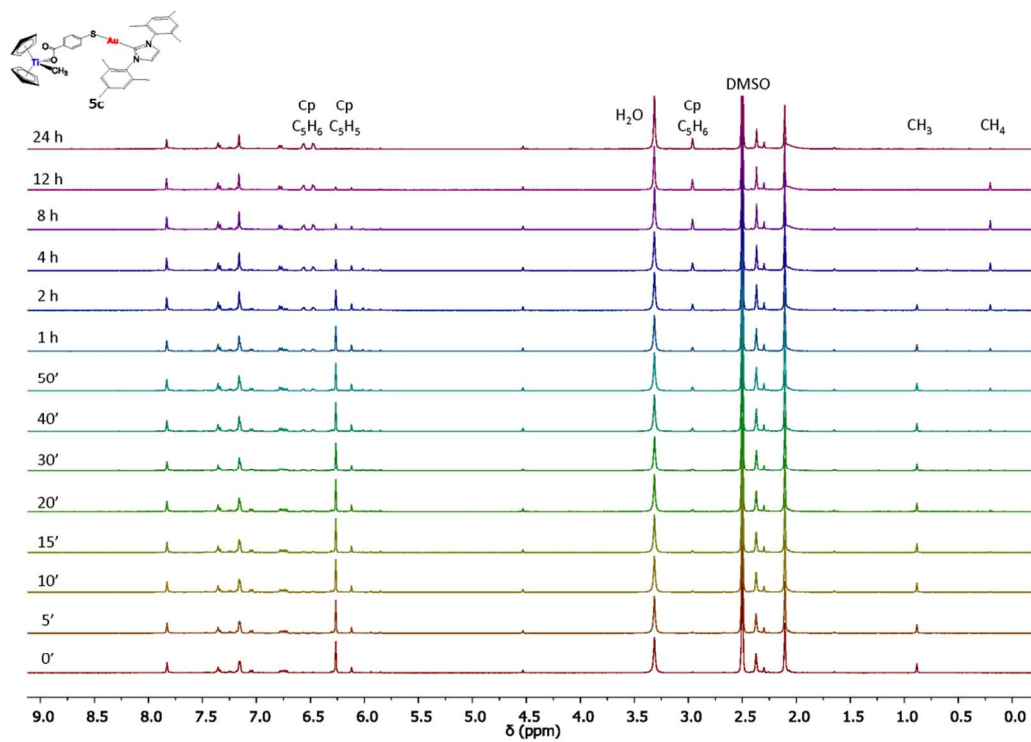

**Figure S19.** Time course  $^1\text{H}$  NMR spectrum in  $\text{DMSO-}d_6$  of compound **5c**.  $t_{1/2} = 2\text{h}$ .

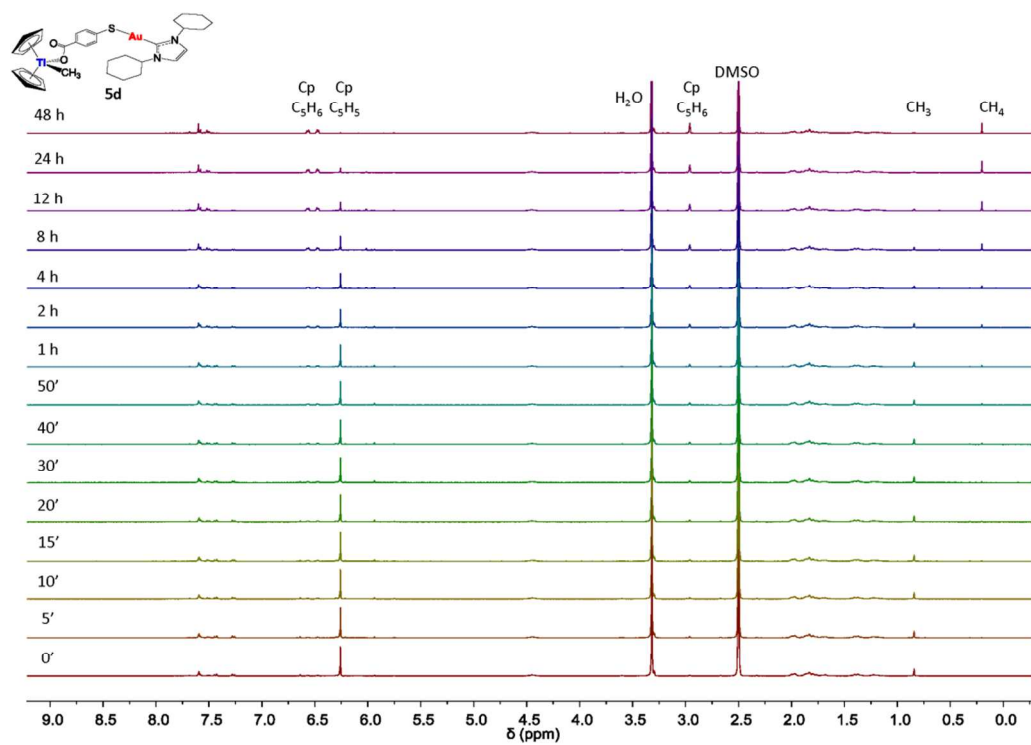

**Figure S20.** Time course  $^1\text{H}$  NMR spectrum in  $\text{DMSO-}d_6$  of compound **5d**.  $t_{1/2} = 2\text{h}$ .

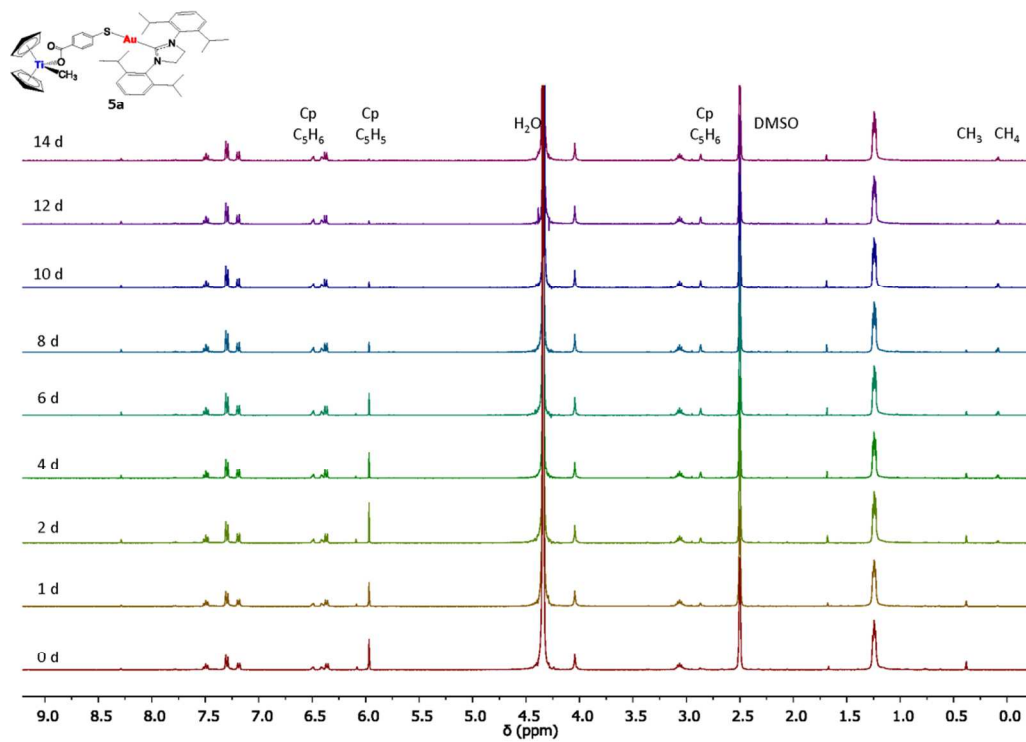

**Figure S21.** Time course  $^1\text{H}$  NMR spectrum in 3:2 DMSO- $d_6$ /PBS- $\text{D}_2\text{O}$  of compound **5a**.  $t_{1/2} = 24\text{h}$ .

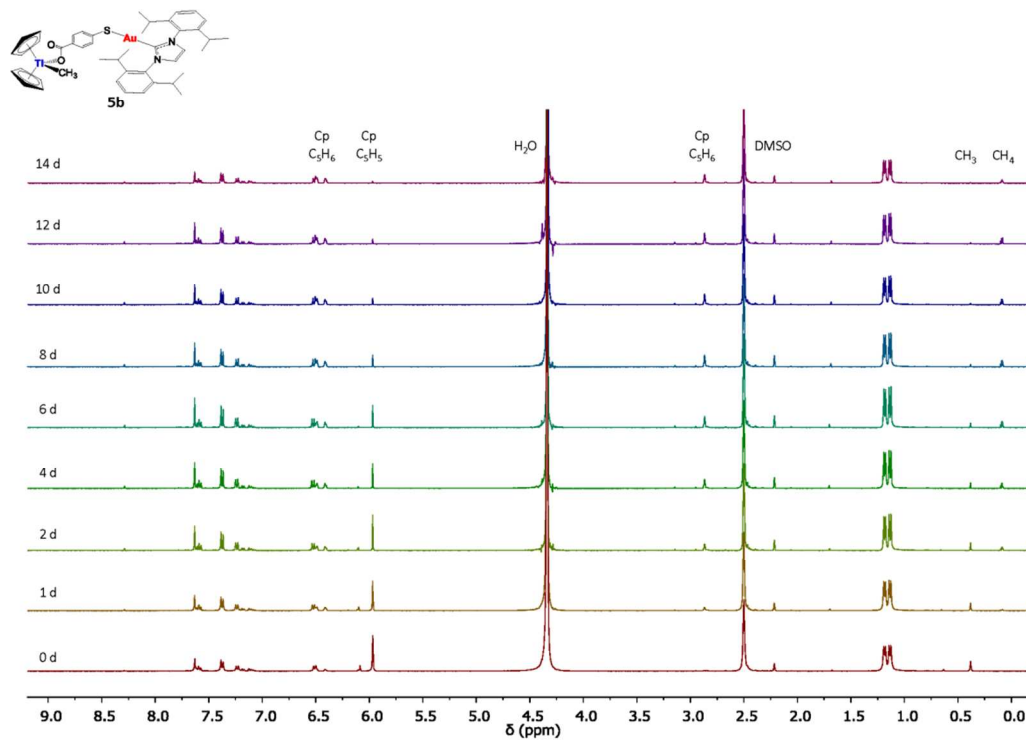

**Figure S22.** Time course  $^1\text{H}$  NMR spectrum in 3:2 DMSO- $d_6$ /PBS- $\text{D}_2\text{O}$  of compound **5b**.  $t_{1/2} = 24\text{h}$ .

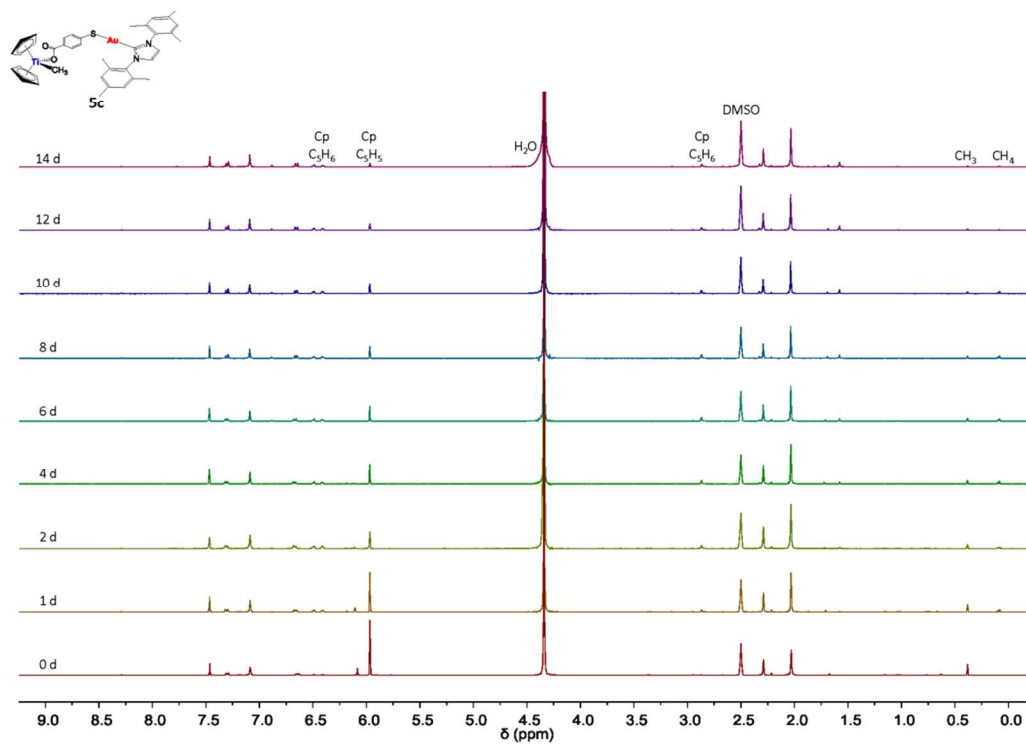

**Figure S23.** Time course  $^1\text{H}$  NMR spectrum in 3:2 DMSO- $d_6$ /PBS- $\text{D}_2\text{O}$  of compound **5c**.  $t_{1/2} = 24\text{h}$ .

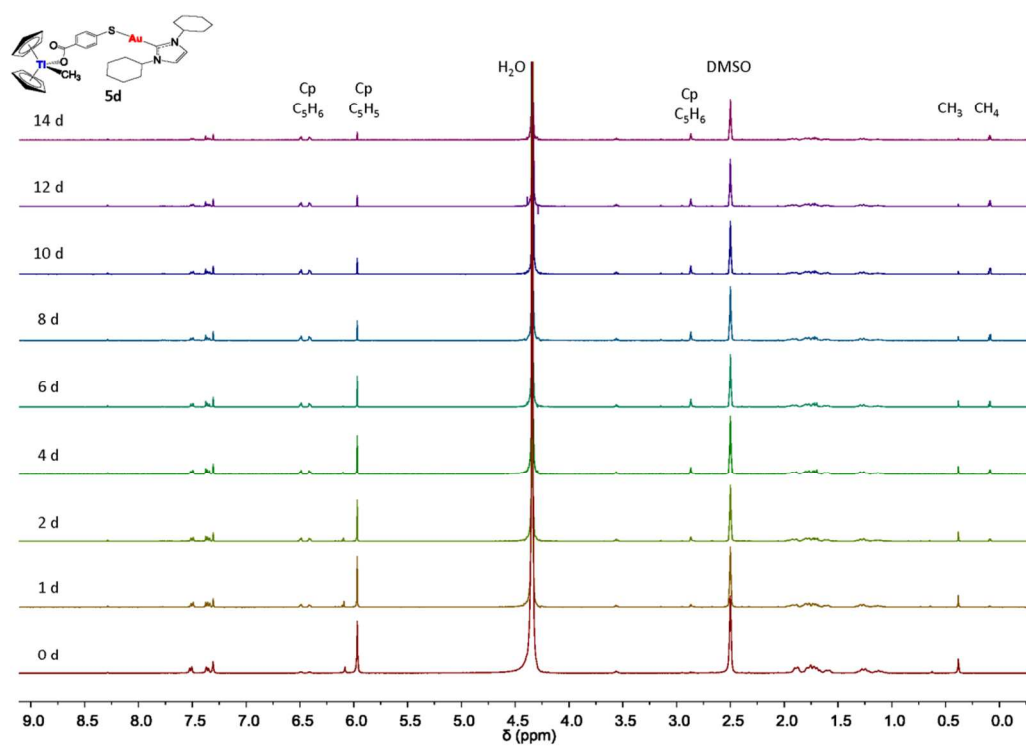

**Figure S24.** Time course  $^1\text{H}$  NMR spectrum in 3:2 DMSO- $d_6$ /PBS- $\text{D}_2\text{O}$  of compound **5d**.  $t_{1/2} = 48\text{h}$ .

### 3. MS ESI+ spectra of all compounds and theoretical isotopic distributions of relevant peaks

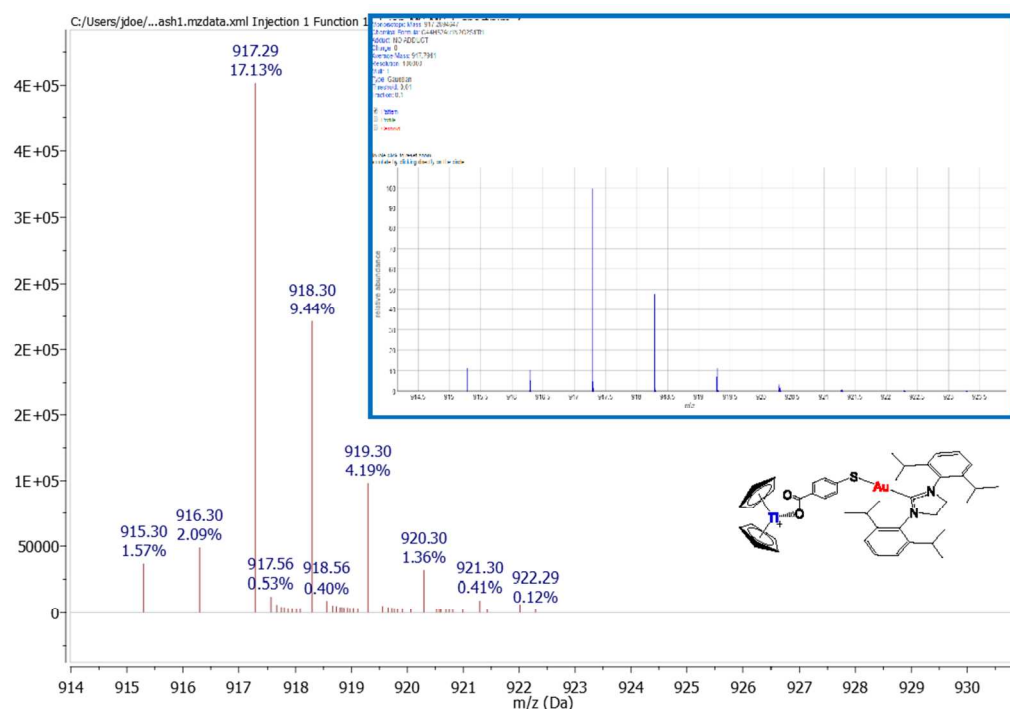

**Figure S25.** Magnification of peak at [m/z]: 917.29 in MS ESI+ of compound **5a** in 1% DMSO/H<sub>2</sub>O solution at t=0. Insert: theoretical isotopic distribution.

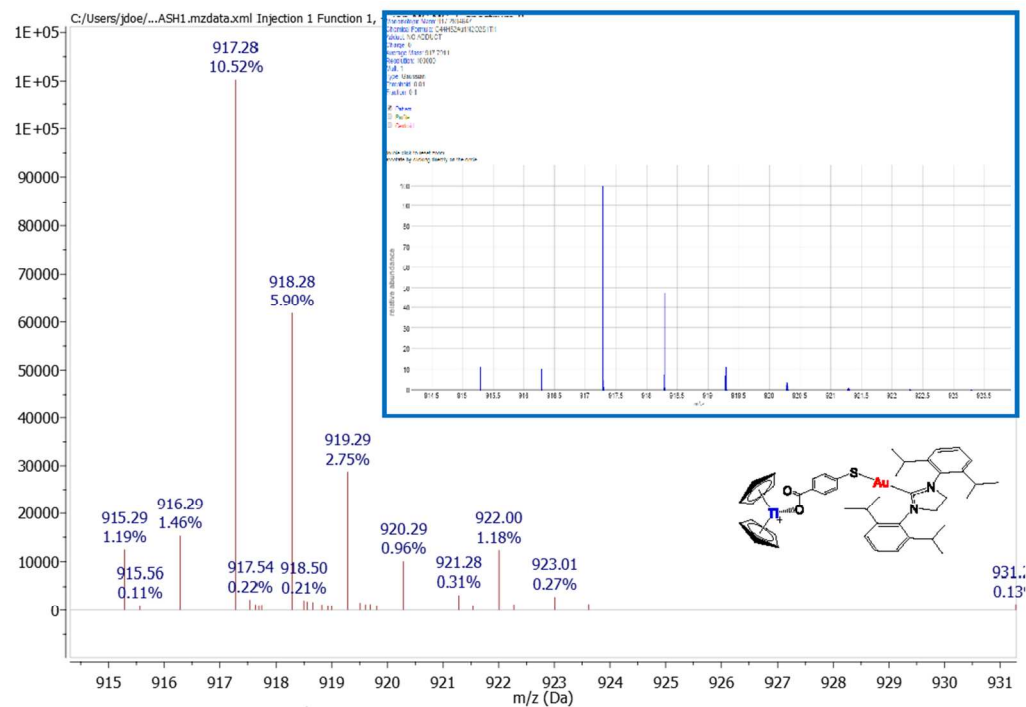

**Figure S26.** Magnification of peak at [m/z]: 917.29 in MS ESI+ of compound **5a** in 1% DMSO/H<sub>2</sub>O solution at t=24h. Insert: theoretical isotopic distribution.

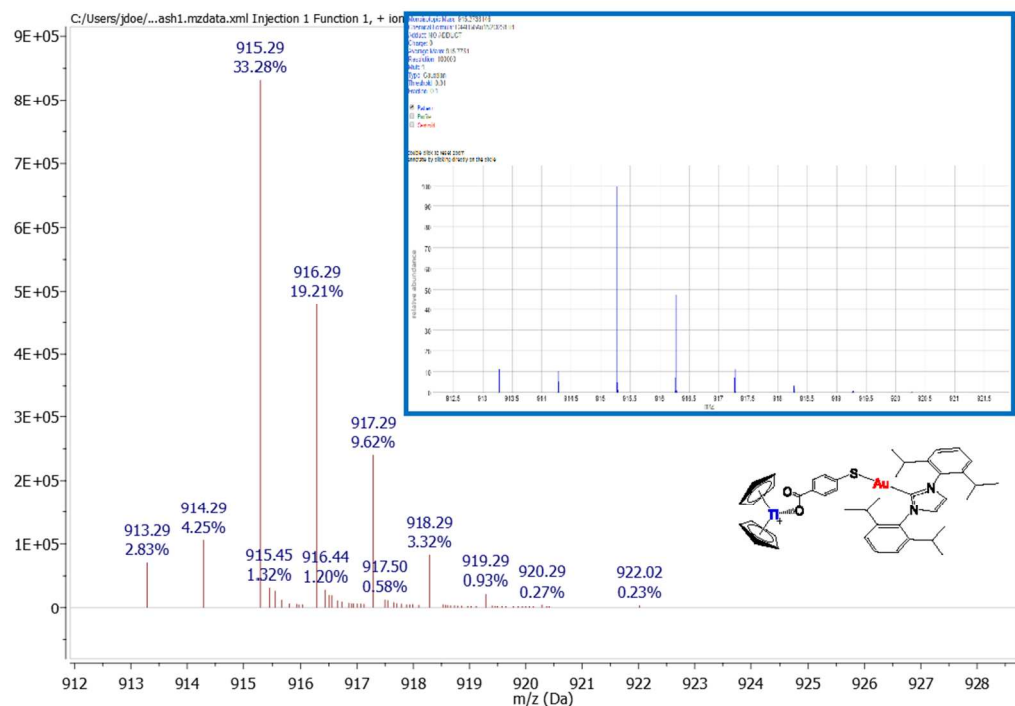

**Figure S27.** Magnification of peak at  $[m/z]$ : 915.21 in MS ESI+ of compound **5b** in 1% DMSO/H<sub>2</sub>O solution at  $t=0$ . Insert: theoretical isotopic distribution.

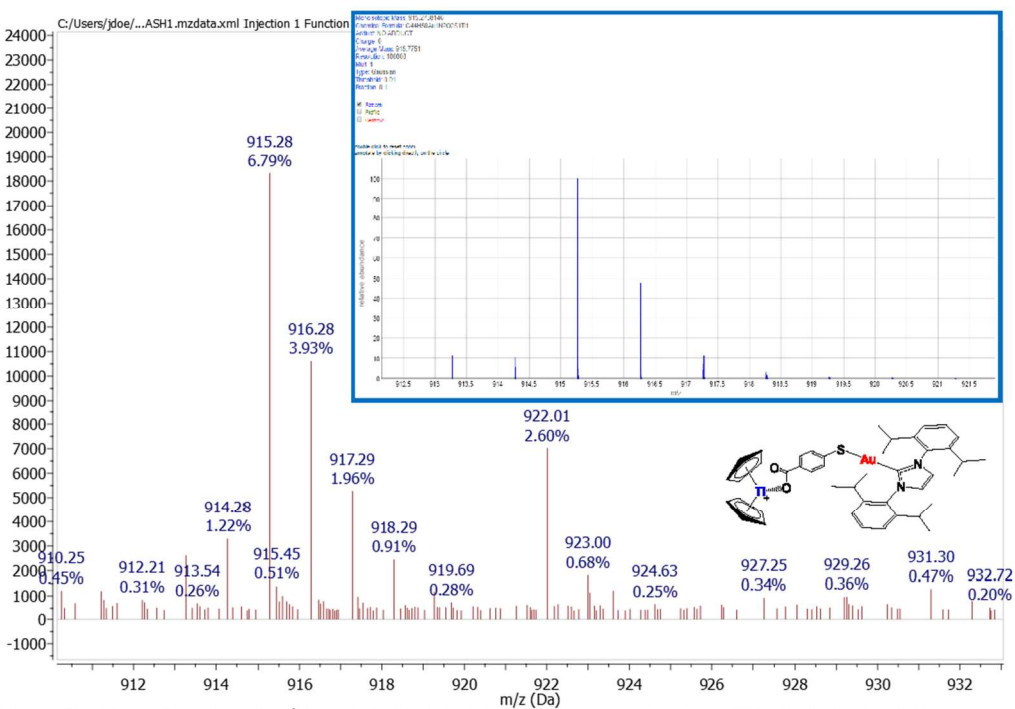

**Figure S28.** Magnification of peak at  $[m/z]$ : 915.21 in MS ESI+ of compound **5b** in 1% DMSO/H<sub>2</sub>O solution at  $t=24h$ . Insert: theoretical isotopic distribution.

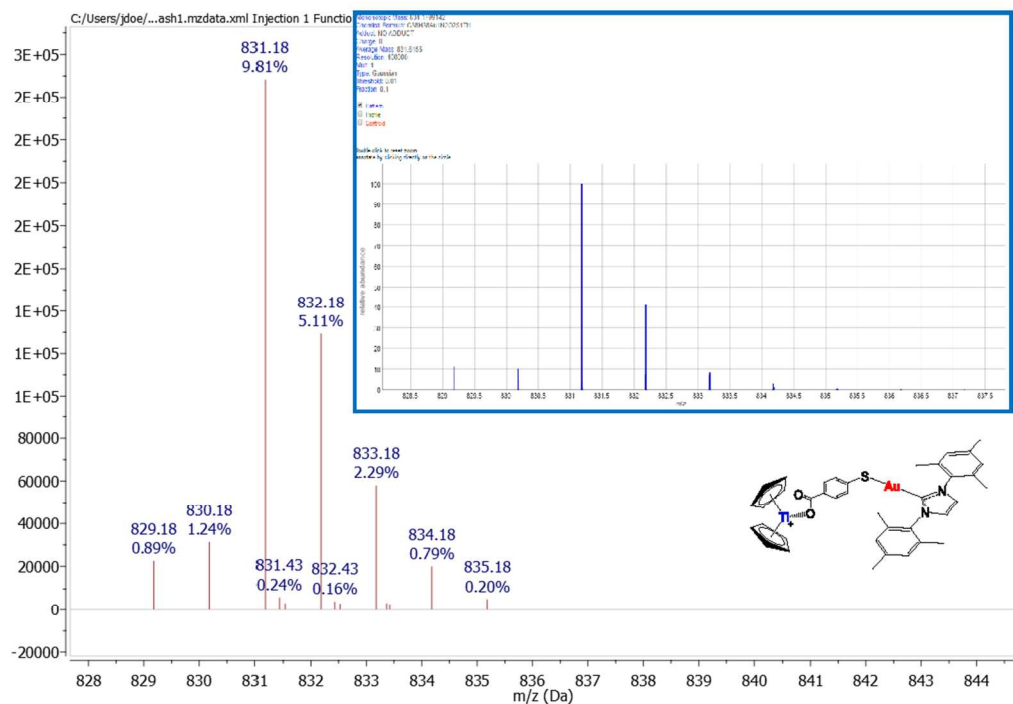

**Figure S29.** Magnification of peak at  $[m/z]$ : 831.16 in MS ESI+ of compound **5c** in 1% DMSO/H<sub>2</sub>O solution at  $t=0$ . Insert: theoretical isotopic distribution.

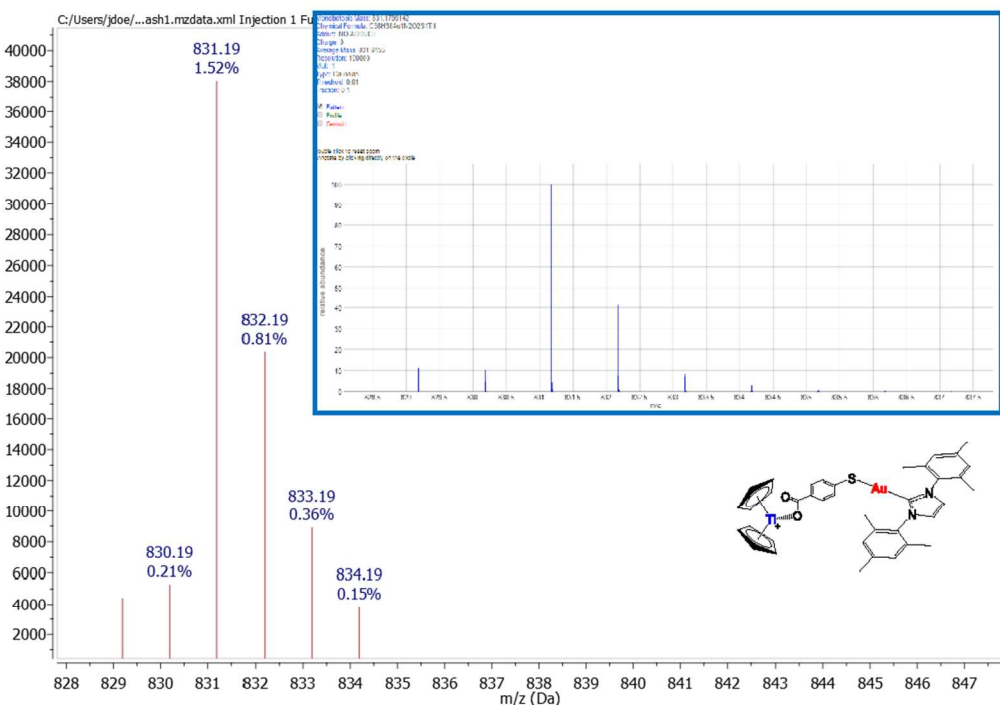

**Figure S30.** Magnification of peak at  $[m/z]$ : 831.16 in MS ESI+ of compound **5c** in 1% DMSO/H<sub>2</sub>O solution at  $t=24$ h. Insert: theoretical isotopic distribution.



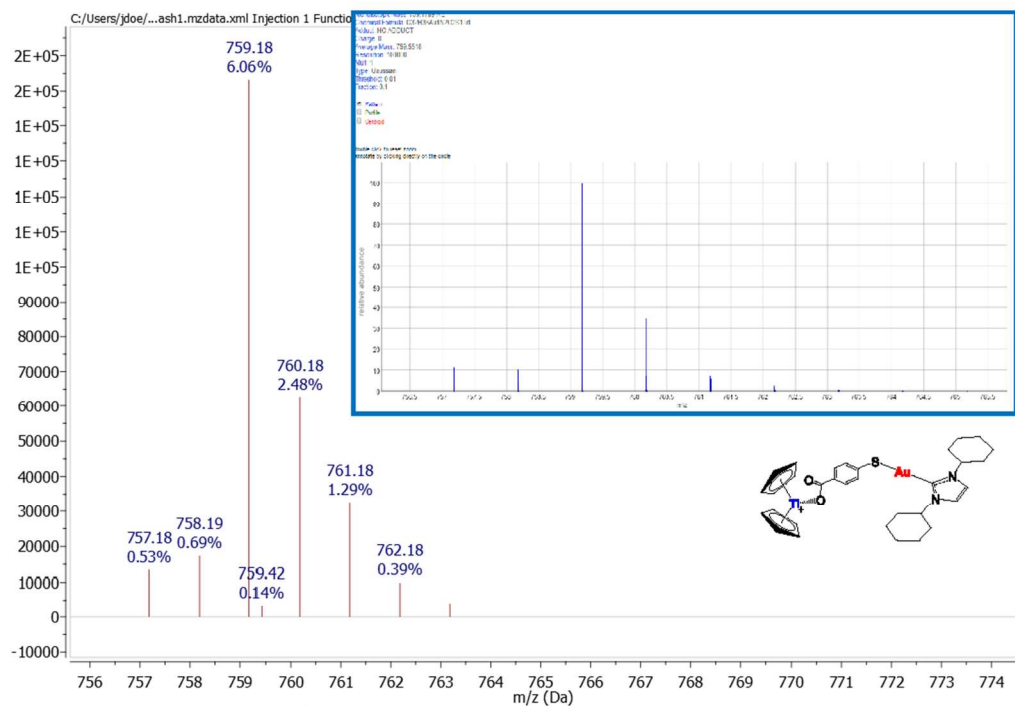

**Figure S31.** Magnification of peak at  $[m/z]$ : 759.16 in MS ESI+ of compound **5d** in 1% DMSO/H<sub>2</sub>O solution at  $t=0$ . Insert: theoretical isotopic distribution.

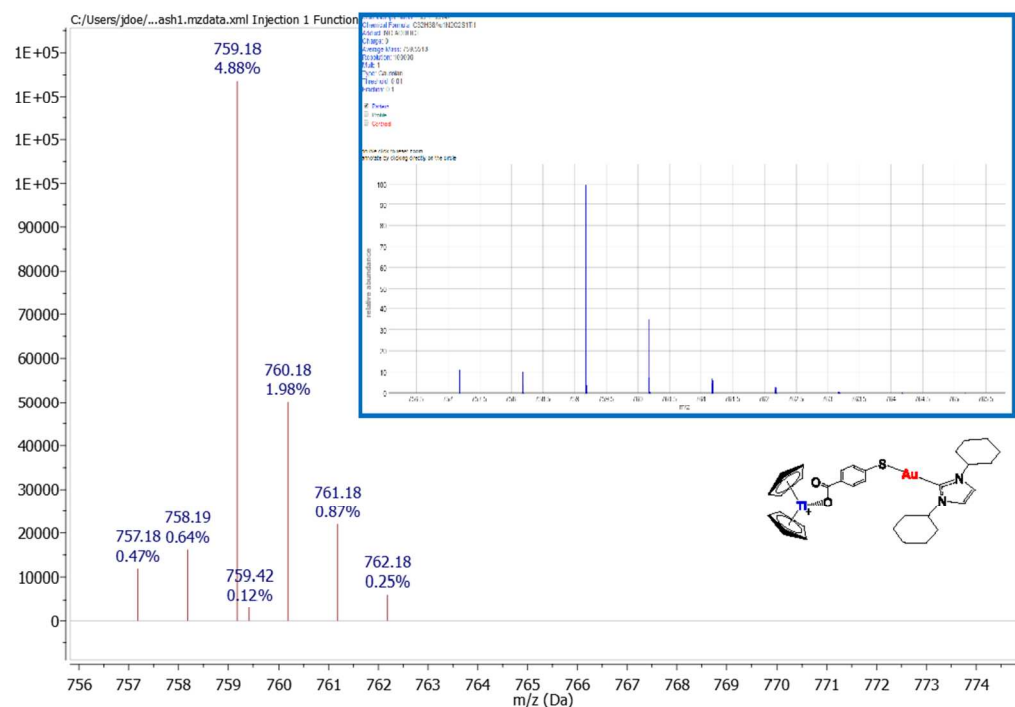

**Figure S32.** Magnification of peak at  $[m/z]$ : 759.16 in MS ESI+ of compound **5d** in 1% DMSO/H<sub>2</sub>O solution at  $t=24h$ . Insert: theoretical isotopic distribution.

#### 4. Solid state IR spectra of all compounds

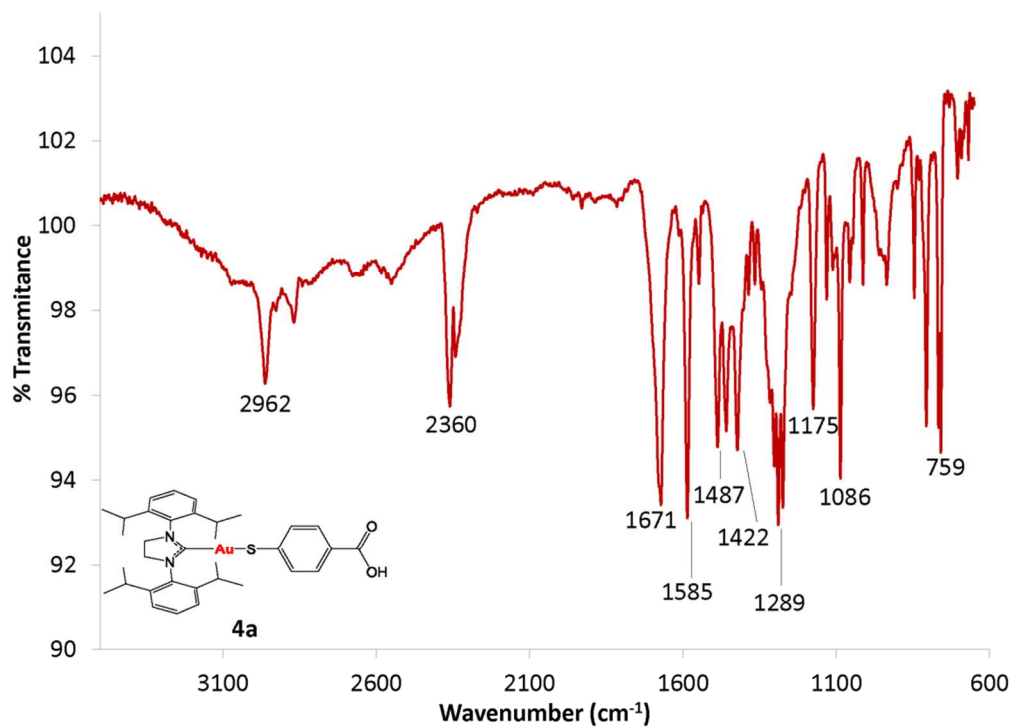

Figure S33. IR spectrum of compound **4a** in solid state at RT.

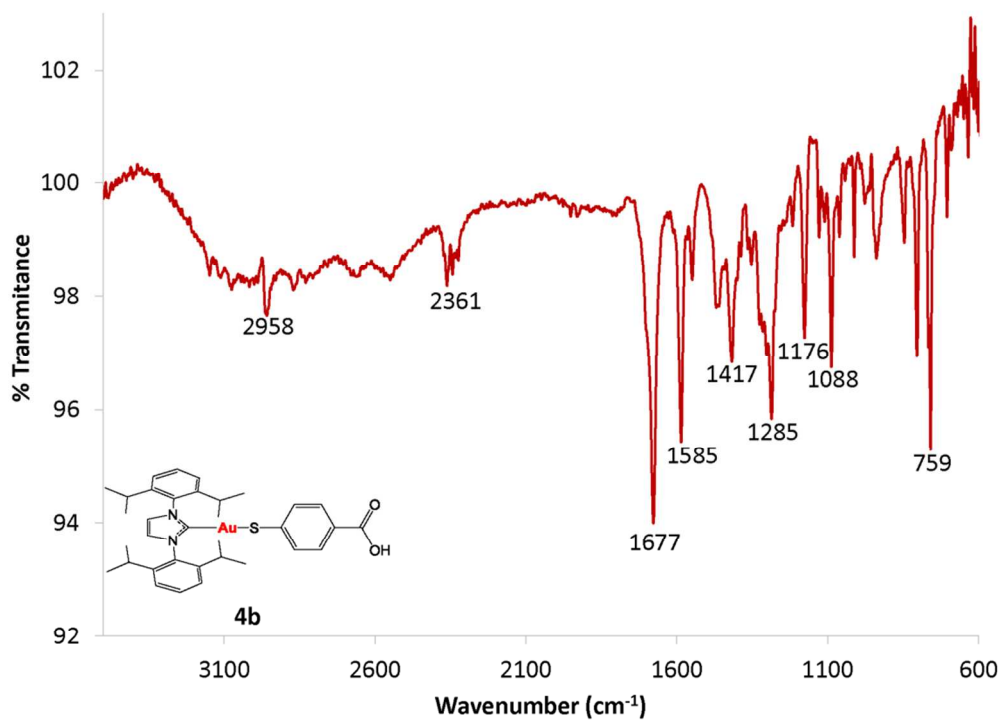

Figure S34. IR spectrum of compound **4b** in solid state at RT.

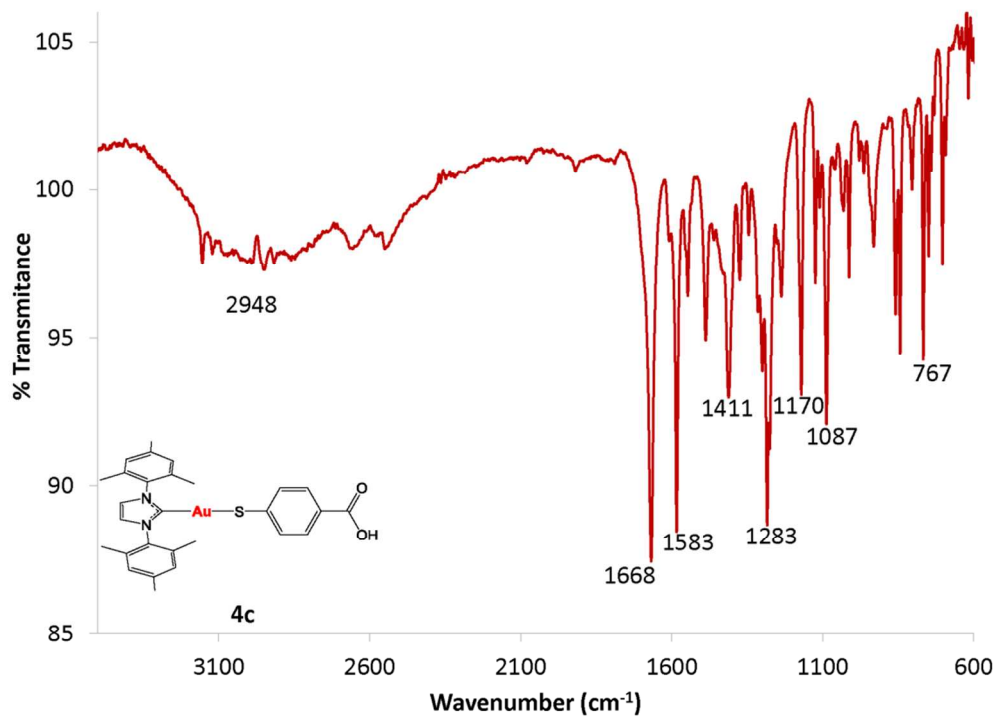

Figure S35. IR spectrum of compound **4c** in solid state at RT.

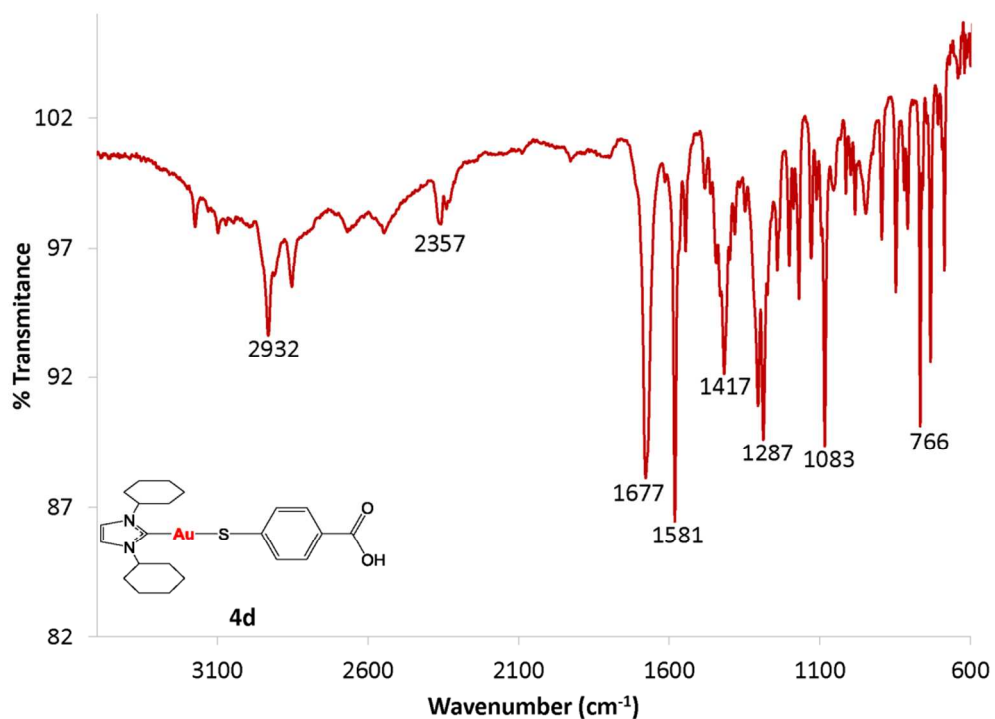

Figure S36. IR spectrum of compound **4d** in solid state at RT.

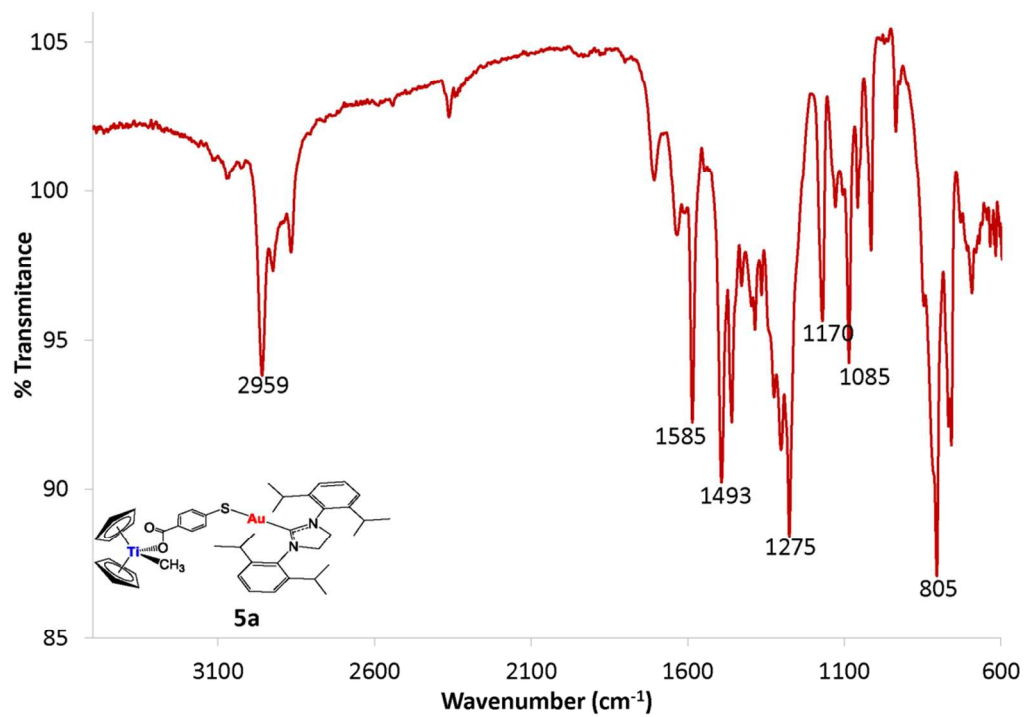

Figure S37. IR spectrum of compound **5a** in solid state at RT.

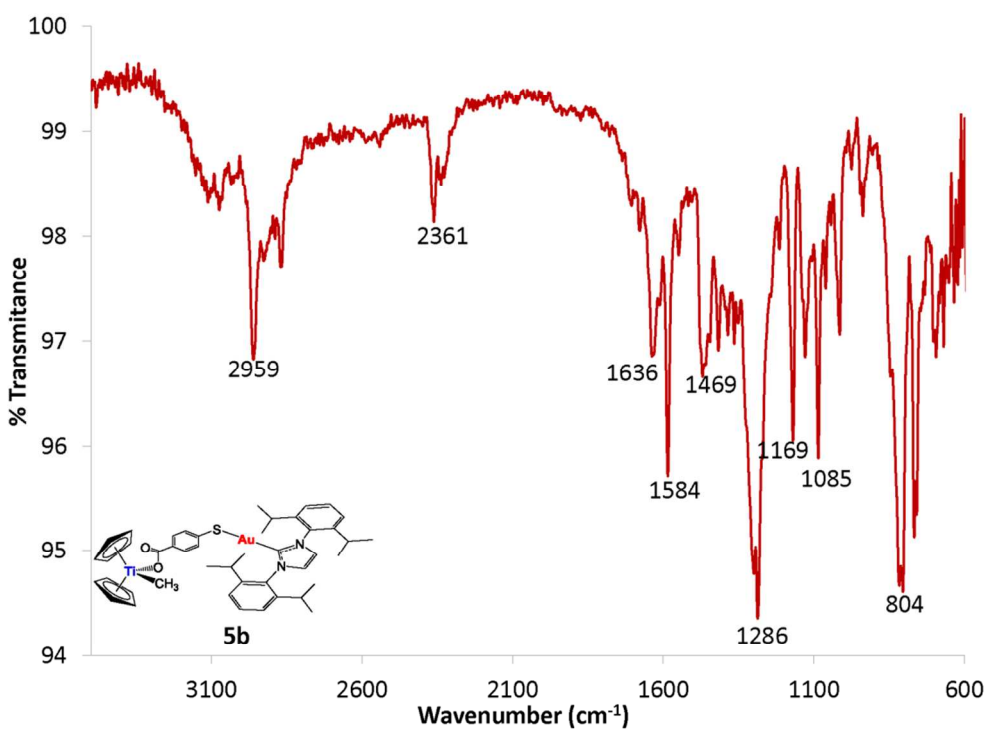

Figure S38. IR spectrum of compound **5b** in solid state at RT.

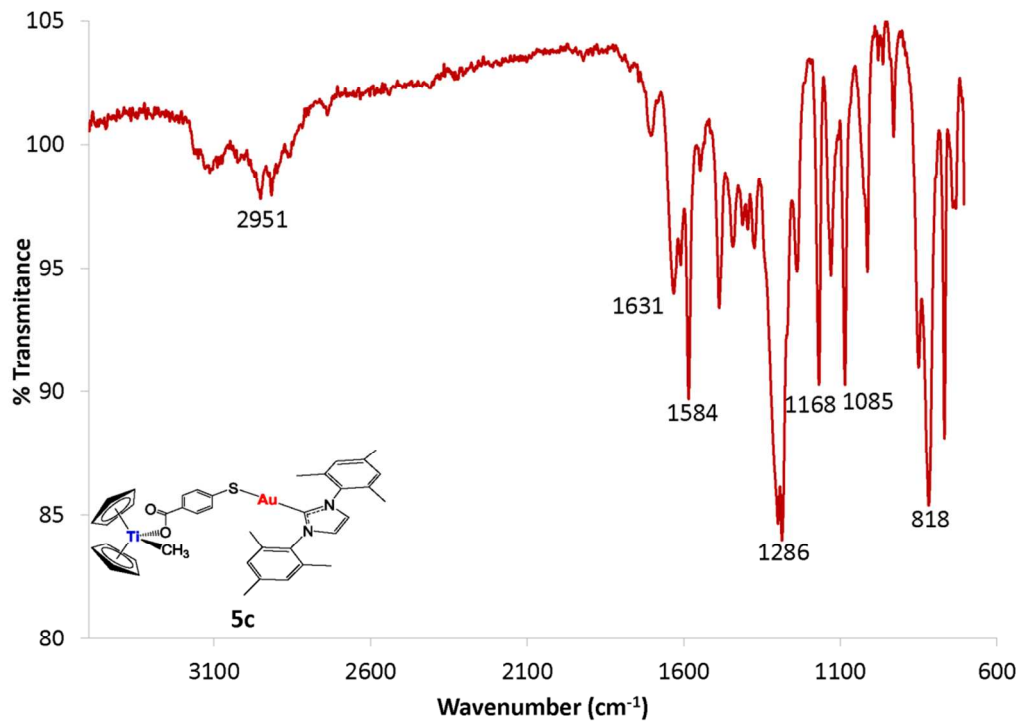

**Figure S39.** IR spectrum of compound **5c** in solid state at RT.

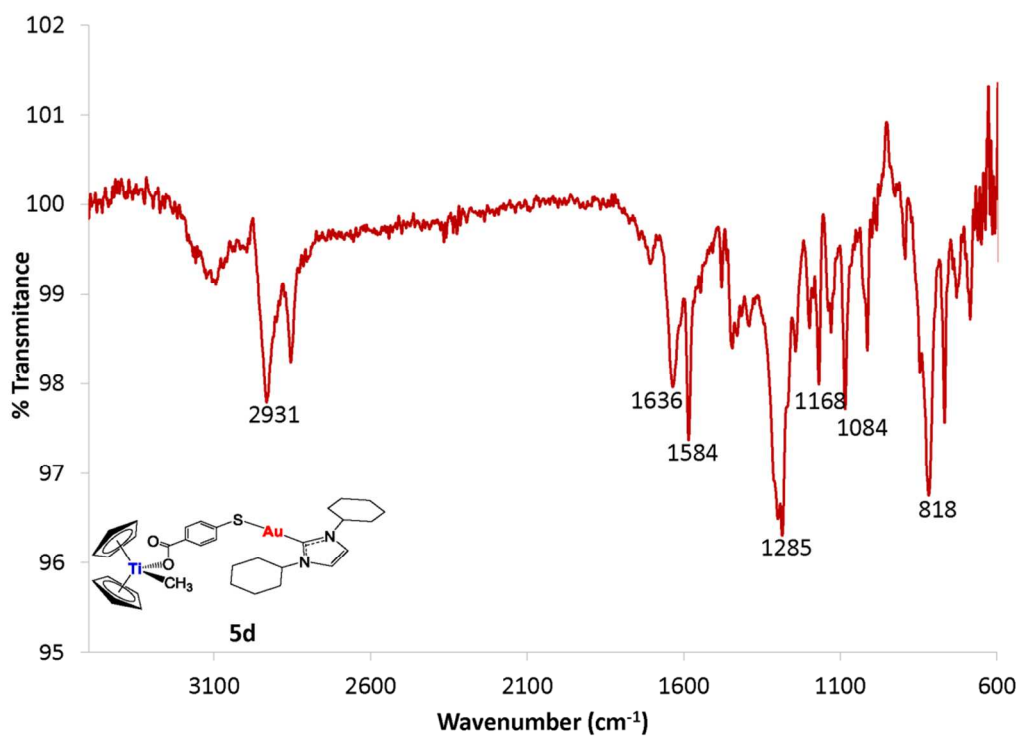

**Figure S40.** IR spectrum of compound **5d** in solid state at RT.

5. UV-visible spectra of compounds **4a-d** and **5a-d** in dichloromethane

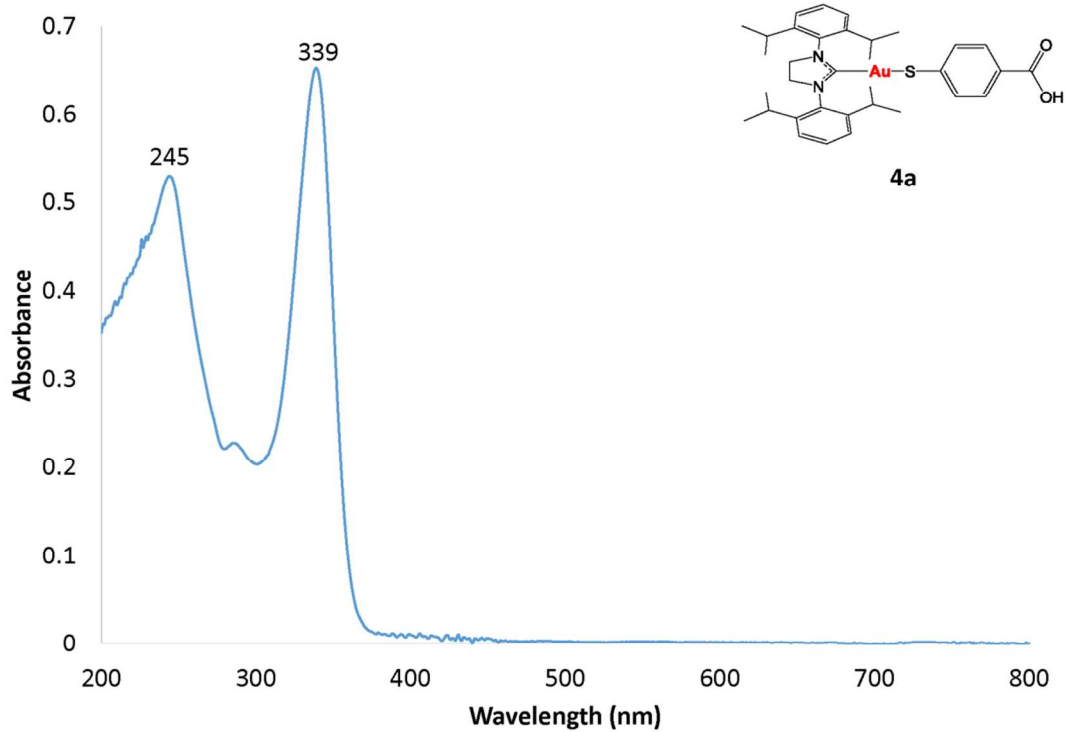

**Figure S41.** UV-visible spectrum of compound **4a** ( $2.00 \times 10^{-5}$  M) in dichloromethane.

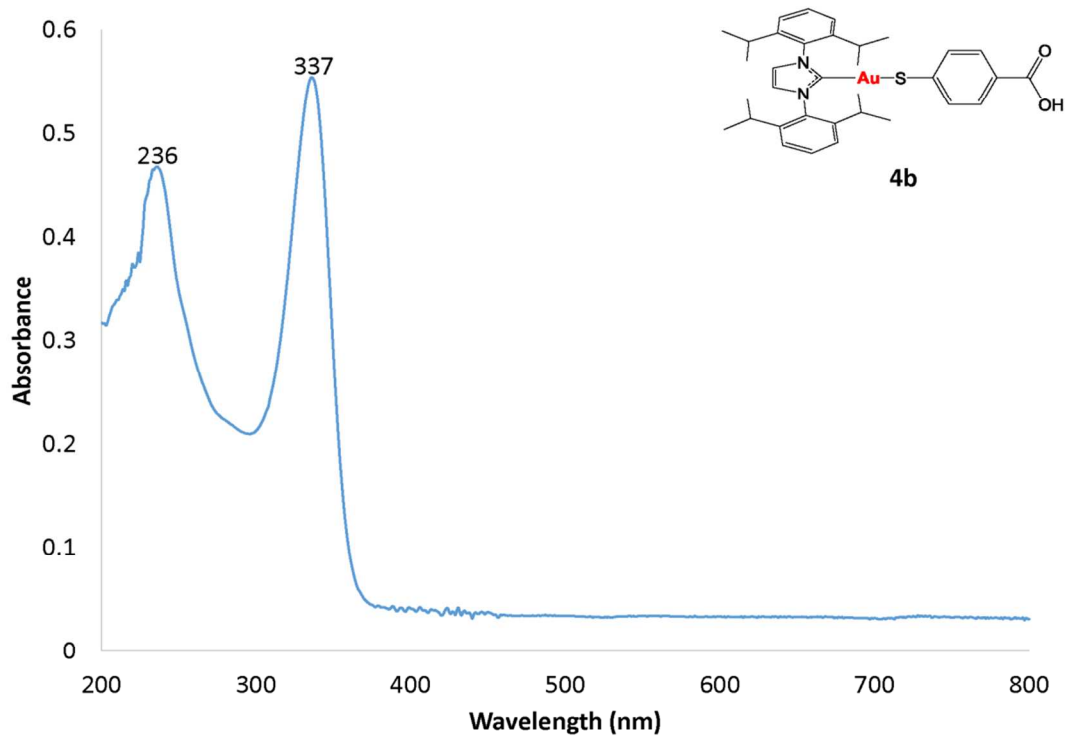

**Figure S42.** UV-visible spectrum of compound **4b** ( $2.00 \times 10^{-5}$  M) in dichloromethane.

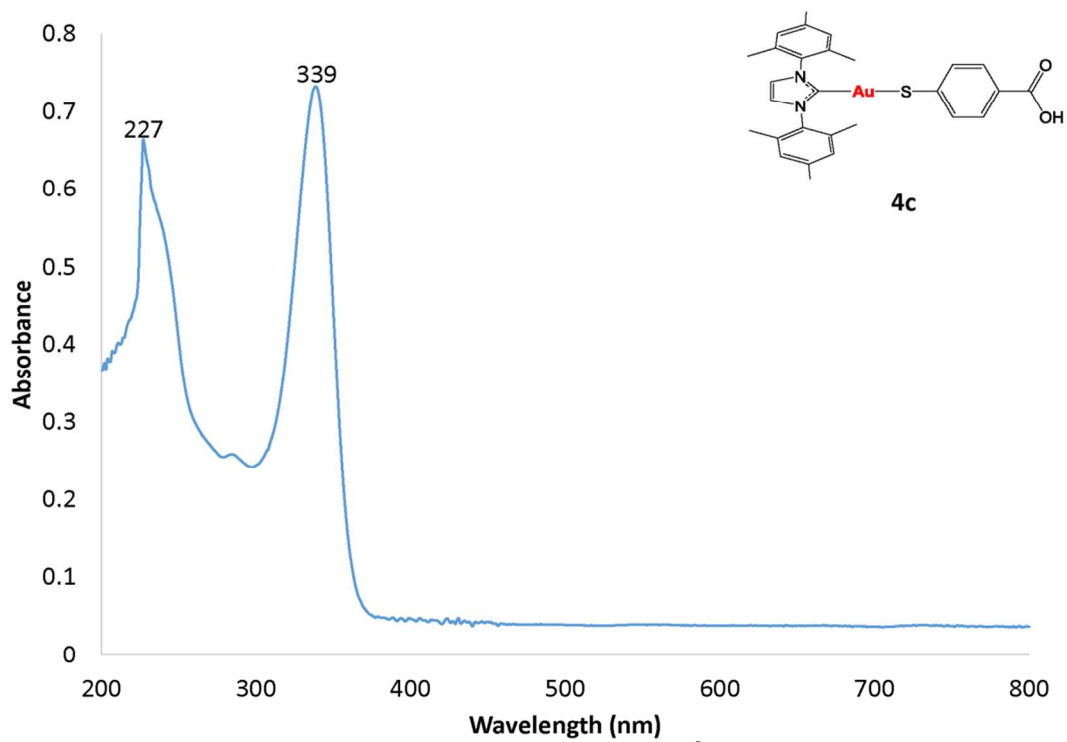

**Figure S43.** UV-visible spectrum of compound **4c** ( $2.18 \cdot 10^{-5}$  M) in dichloromethane.

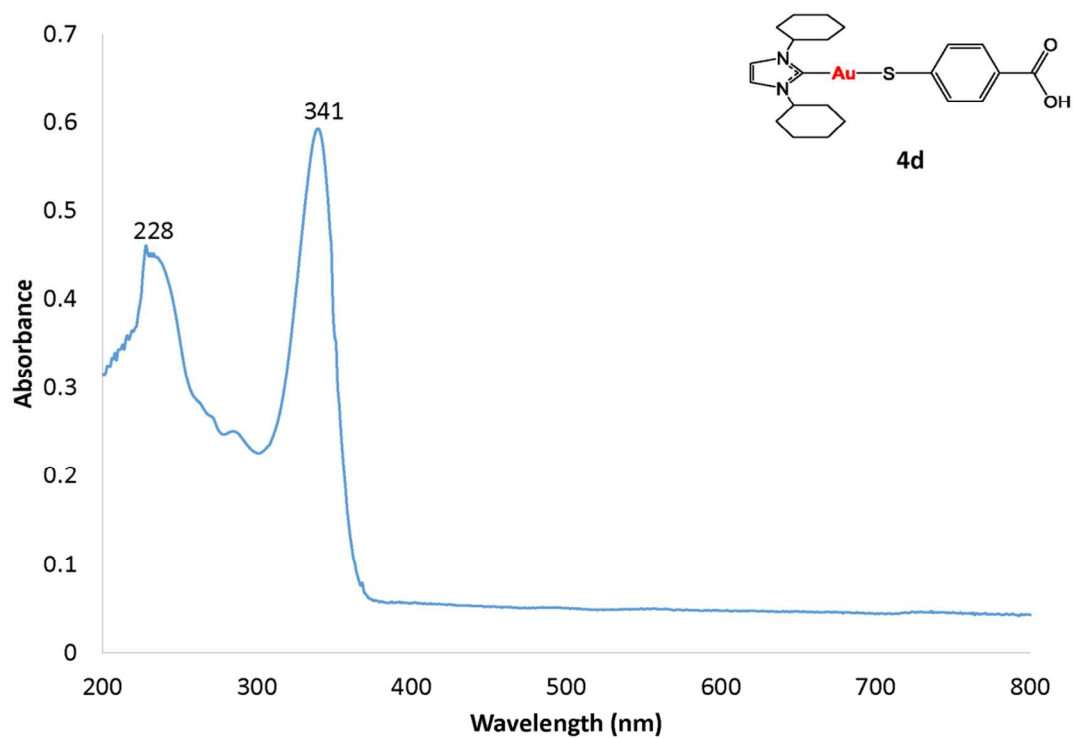

**Figure S44.** UV-visible spectrum of compound **4d** ( $2.35 \cdot 10^{-5}$  M) in dichloromethane.

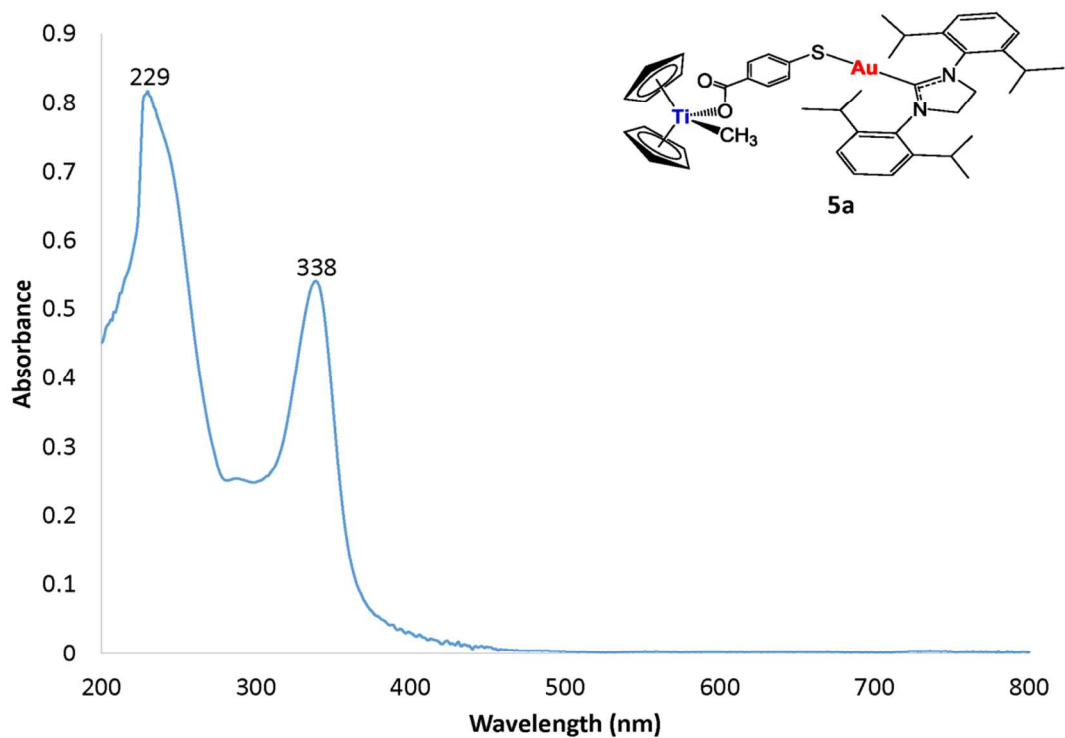

**Figure S45.** UV-visible spectrum of compound **5a** ( $3.22 \cdot 10^{-5}$  M) in dichloromethane.

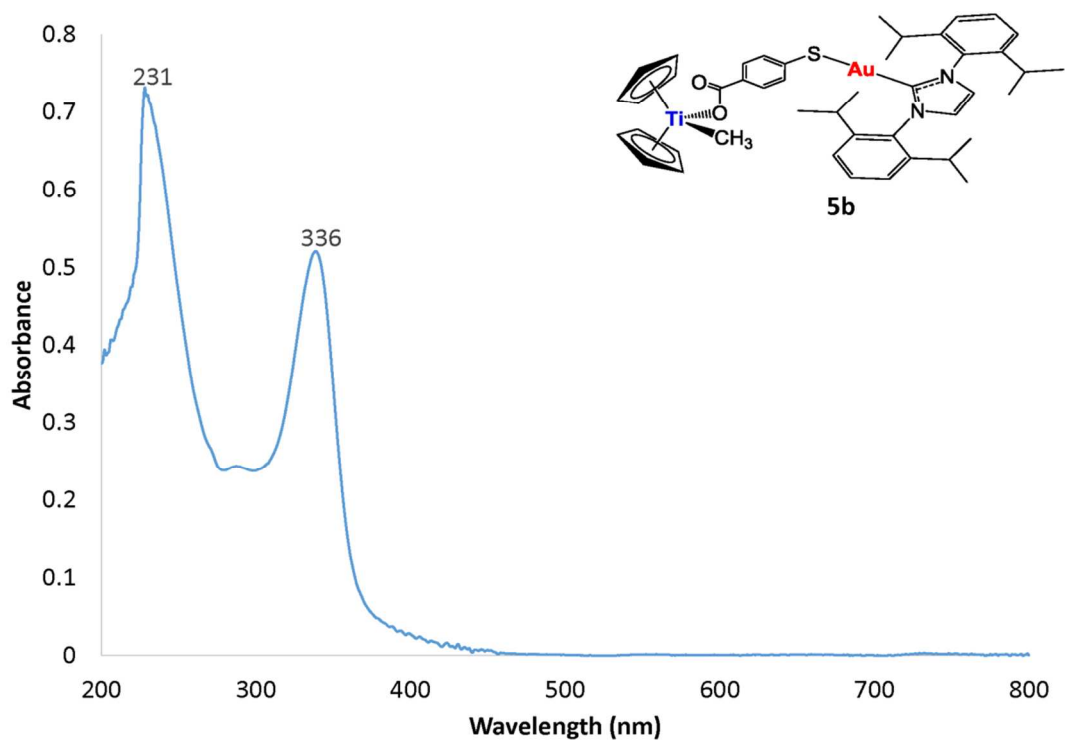

**Figure S46.** UV-visible spectrum of compound **5b** ( $2.00 \cdot 10^{-5}$  M) in dichloromethane.



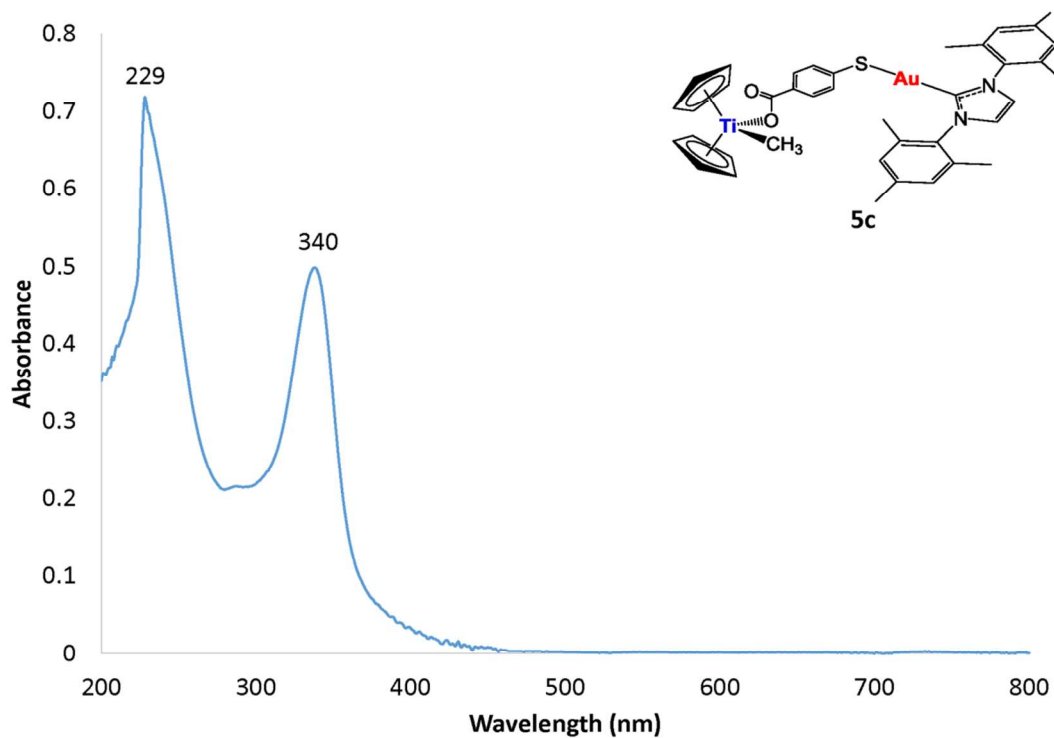

**Figure S47.** UV-visible spectrum of compound **5c** ( $1.72 \cdot 10^{-5}$  M) in dichloromethane.

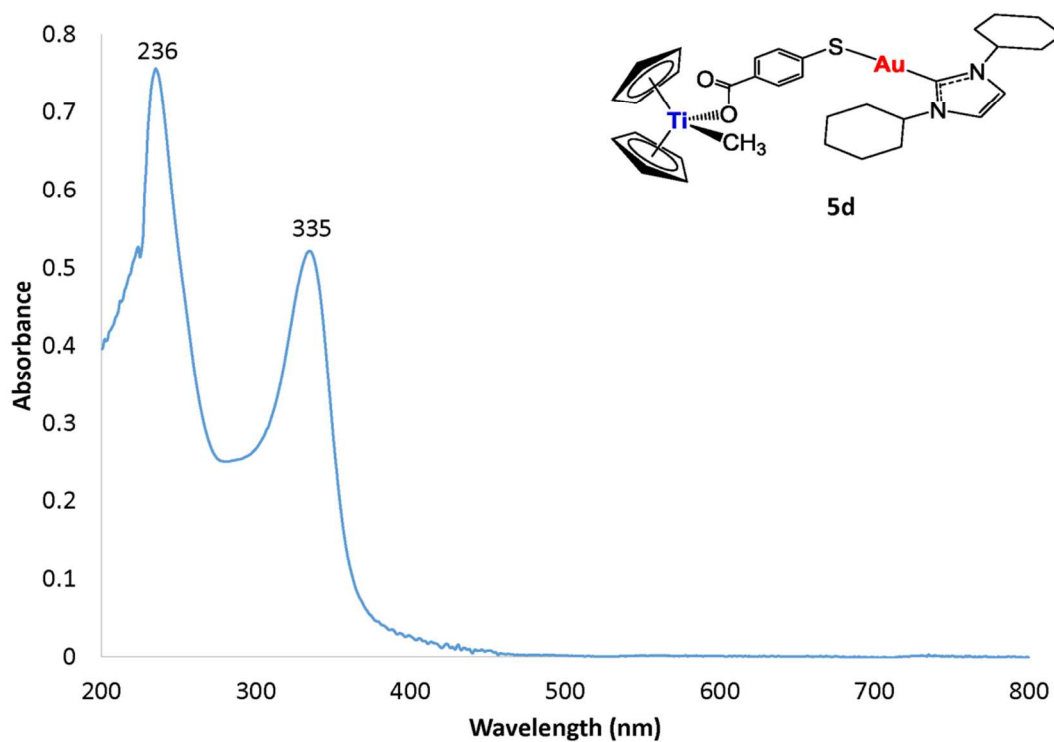

**Figure S48.** UV-visible spectrum of compound **5d** ( $2.84 \cdot 10^{-5}$  M) in dichloromethane.

## 6. Crystallographic data for compound **4c**

**Table S1.** Crystal Data and Structure Refinement for compound **4c**.

|                                                 |                                                                   |
|-------------------------------------------------|-------------------------------------------------------------------|
| formula                                         | C <sub>28</sub> H <sub>29</sub> AuN <sub>2</sub> O <sub>2</sub> S |
| fw                                              | 654.56                                                            |
| T [K]                                           | 293 (2)                                                           |
| $\lambda$ (MoK $\alpha$ )[Å]                    | 0.71073                                                           |
| crystal system                                  | Triclinic                                                         |
| space group                                     | P-1                                                               |
| <i>a</i> [Å]                                    | 12.093(2)                                                         |
| <i>b</i> [Å]                                    | 15.270(3)                                                         |
| <i>c</i> [Å]                                    | 17.367(4)                                                         |
| $\alpha$ [°]                                    | 66.62(3)                                                          |
| $\beta$ [°]                                     | 75.42(3)                                                          |
| $\gamma$ [°]                                    | 89.04(3)                                                          |
| <i>V</i> [Å] <sup>3</sup>                       | 2836.4(10)                                                        |
| <i>Z</i>                                        | 4                                                                 |
| <i>D</i> <sub>calcd</sub> (mg m <sup>-3</sup> ) | 1.533                                                             |
| $\mu$ (mm <sup>-1</sup> )                       | 5.285                                                             |
| F(000)                                          | 1288                                                              |
| Crystal size (mm)                               | 0.24 x 0.22 x 0.21                                                |
| Theta range for data collection                 | 1.33 to 27.53 deg.                                                |
| Limiting indices                                | -15 ≤ <i>h</i> ≤ 15, -19 ≤ <i>k</i> ≤ 19, -22 ≤ <i>l</i> ≤ 22     |
| Reflections collected / unique                  | 22162 / 12924 [R(int) = 0.0300]                                   |
| Completeness to theta = 24.71                   | 98.8 %                                                            |
| Refinement method                               | Full-matrix least-squares on F <sup>2</sup>                       |
| Data / restraints / parameters                  | 12924 / 0 / 613                                                   |
| GOF                                             | 0.785                                                             |
| Final R indices [I > 2σ(I)]                     | R1 = 0.0359, wR2 = 0.0869                                         |
| R indices (all data)                            | R1 = 0.0636, wR2 = 0.0991                                         |
| Largest diff. peak and hole                     | 1.220 and -1.151 e.Å <sup>-3</sup>                                |

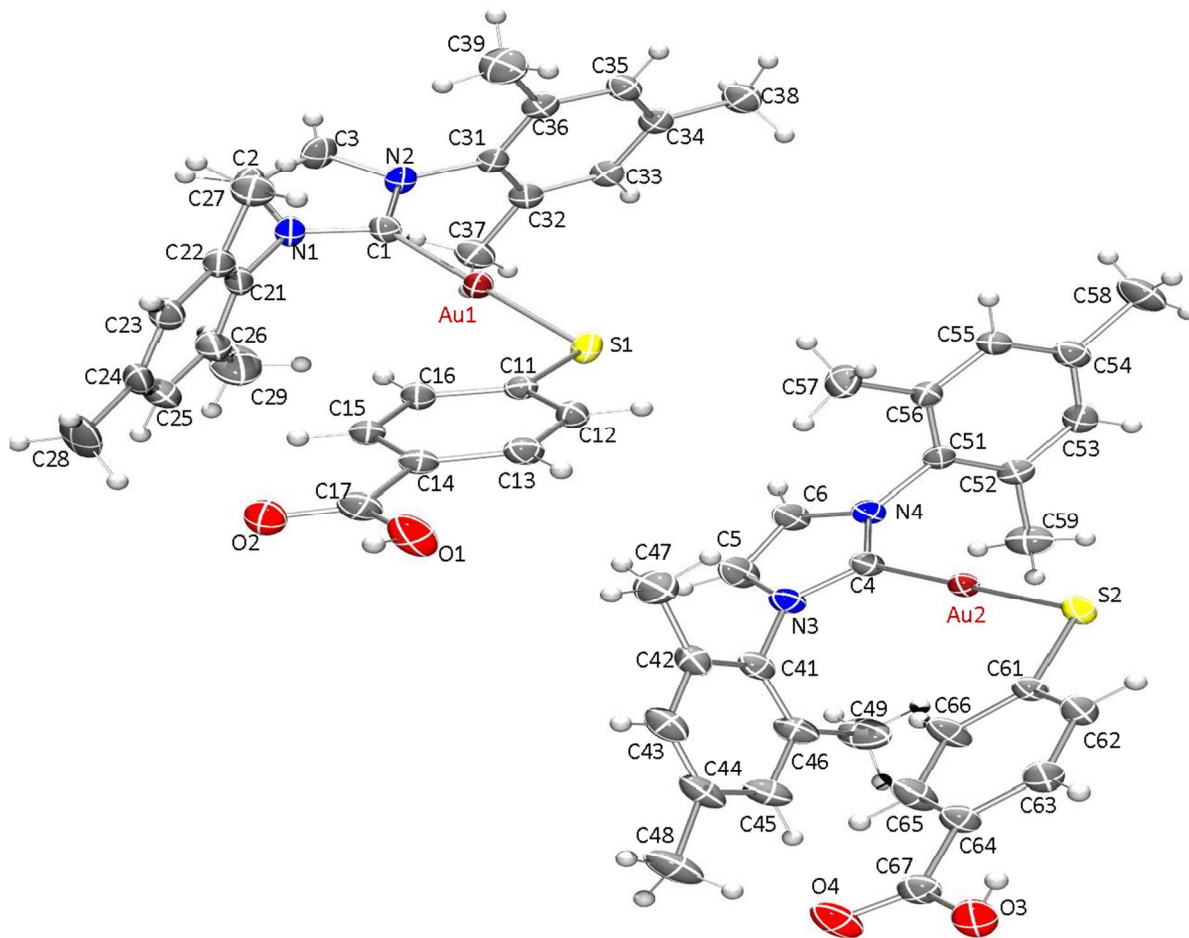

**Figure S49.** ORTEP view of the molecular structure of compound **4c** showing labelling scheme.

**Table S2.** Selected Structural Parameters of compound **4c** from X-ray single crystal diffraction studies. Bond lengths in Å and angles in °.

|            |            |                  |            |
|------------|------------|------------------|------------|
| Au(1)-C(1) | 1.995(6)   | C(1)-Au(1)-S(1)  | 177.76(18) |
| Au(1)-S(1) | 2.2790(17) | C(11)-S(1)-Au(1) | 105.92(19) |
| S(1)-C(11) | 1.746(6)   | C(1)-N(1)-C(2)   | 111.4(5)   |
| C(1)-N(1)  | 1.353(7)   | C(1)-N(1)-C(21)  | 123.4(5)   |
| C(1)-N(2)  | 1.341(7)   | C(2)-N(1)-C(21)  | 125.2(5)   |
| N(1)-C(2)  | 1.381(8)   | N(2)-C(1)-N(1)   | 104.2(5)   |
| N(1)-C(21) | 1.453(7)   | N(2)-C(1)-Au(1)  | 129.8(4)   |
| N(2)-C(3)  | 1.382(7)   | N(1)-C(1)-Au(1)  | 126.0(4)   |
| N(2)-C(31) | 1.456(7)   | C(1)-N(2)-C(3)   | 111.1(5)   |
| C(2)-C(3)  | 1.335(9)   | C(1)-N(2)-C(31)  | 124.8(4)   |
| O(1)-C(17) | 1.288(8)   | C(3)-N(2)-C(31)  | 124.1(5)   |
| O(2)-C(17) | 1.240(8)   | C(3)-C(2)-N(1)   | 106.2(5)   |
| Au(2)-C(4) | 1.994(6)   | C(4)-Au(2)-S(2)  | 179.03(17) |
| Au(2)-S(2) | 2.2888(17) | C(61)-S(2)-Au(2) | 105.90(18) |
| S(2)-C(61) | 1.753(5)   | C(4)-N(3)-C(5)   | 110.7(5)   |
| C(4)-N(3)  | 1.348(7)   | C(4)-N(3)-C(41)  | 124.4(5)   |
| C(4)-N(4)  | 1.357(7)   | C(5)-N(3)-C(41)  | 124.9(5)   |
| N(3)-C(5)  | 1.387(8)   | N(3)-C(4)-N(4)   | 105.2(5)   |
| N(3)-C(41) | 1.440(7)   | N(3)-C(4)-Au(2)  | 125.9(4)   |
| N(4)-C(6)  | 1.385(7)   | N(4)-C(4)-Au(2)  | 128.8(4)   |
| N(4)-C(51) | 1.440(7)   | C(4)-N(4)-C(6)   | 110.7(5)   |
| C(5)-C(6)  | 1.352(9)   | C(4)-N(4)-C(51)  | 125.8(4)   |
| O(3)-C(67) | 1.289(8)   | C(6)-N(4)-C(51)  | 123.4(5)   |
| O(4)-C(67) | 1.239(8)   | C(5)-C(6)-N(4)   | 106.5(5)   |

## 7. DFT Studies for compounds **4a-d** and **5a-d**

### 7.1. Computational details and structures.

The calculations have been performed using the hybrid density functional method B3LYP,<sup>4</sup> as implemented in Gaussian09.<sup>5</sup> Geometries were optimized with the 6-311G(d) basis set for the P and S elements, the 6-31G(d,p) basis set for the C, N, S, and H elements and the SDD pseudopotential for the titanium, iron and gold metal centers.<sup>6</sup> Frequency calculations have been done at the same level of theory as the geometry optimizations to confirm the nature of the stationary points.

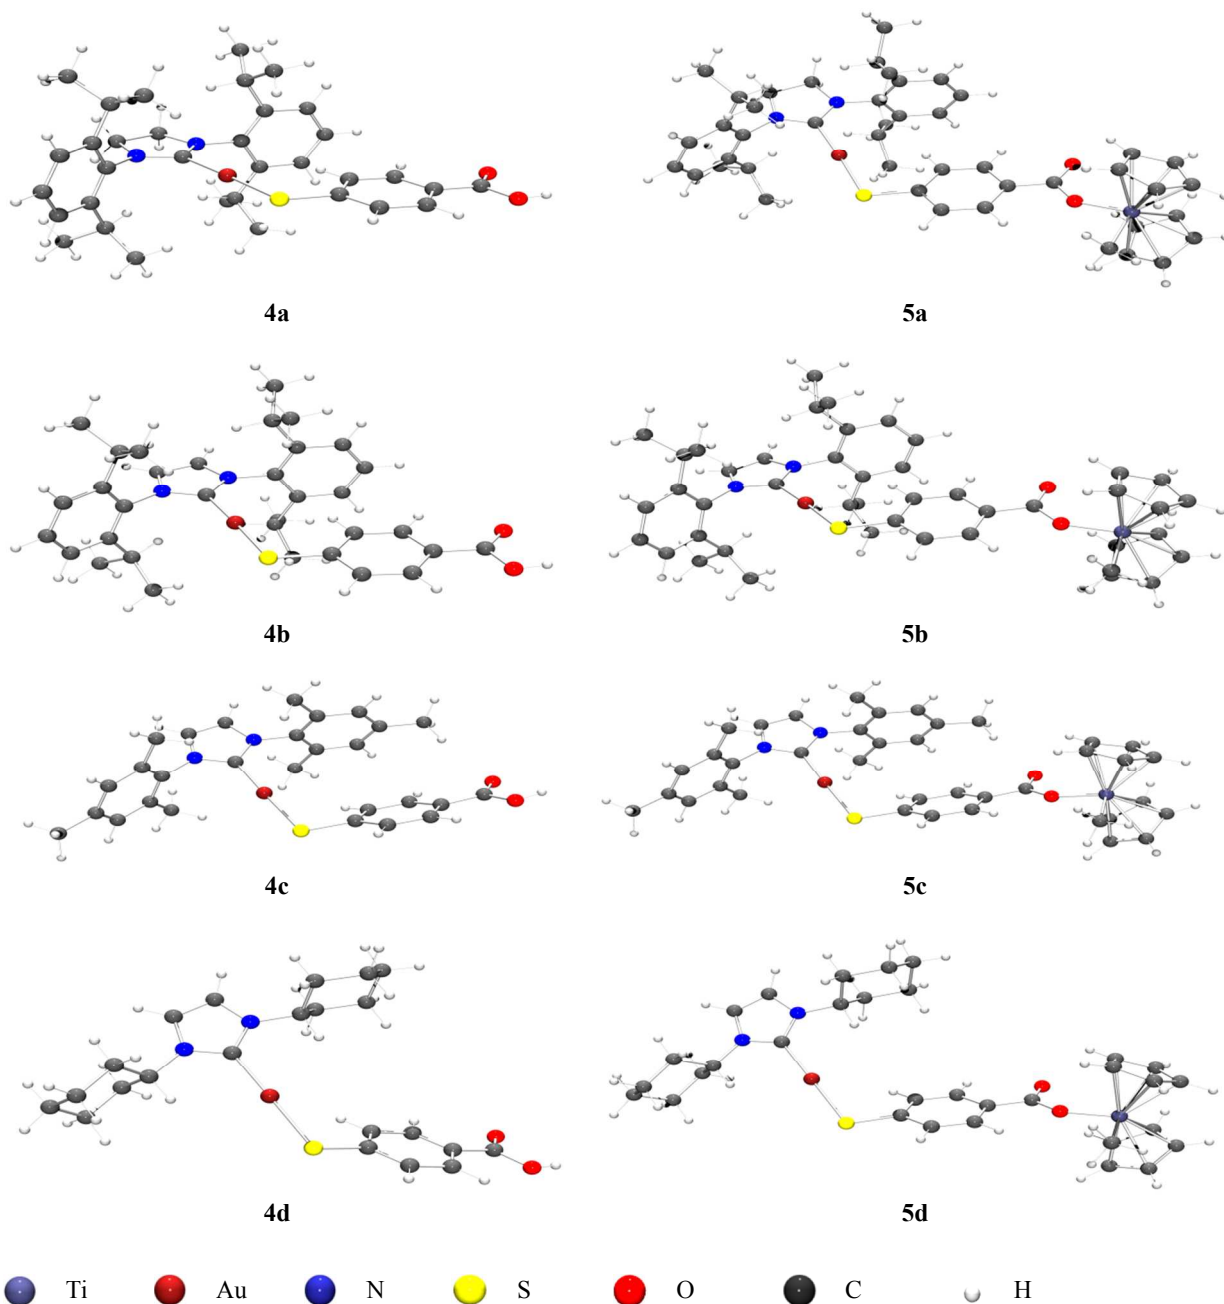

**Figure S50.** Optimized structures of monometallic compounds **4a-d** and bimetallic compounds **5a-d**.

7.2. Calculated IR spectra of compounds **4a-d** and **5a-d**

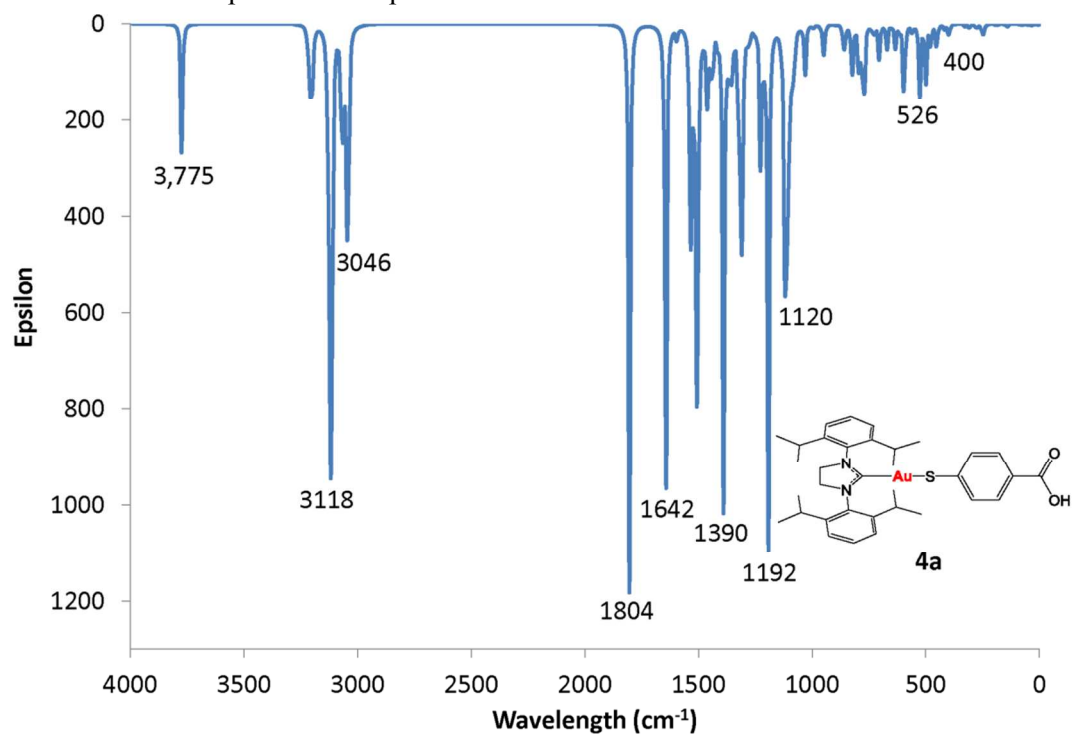

Figure S51. Calculated IR spectrum of compound **4a**.

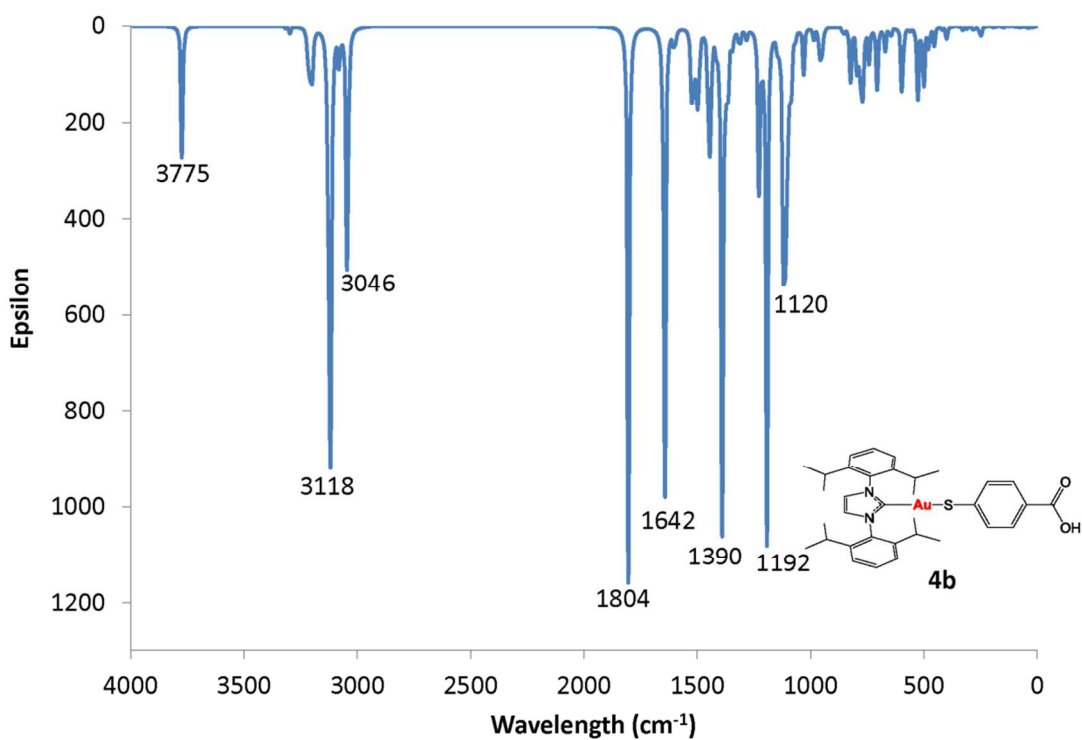

Figure S52. Calculated IR spectrum of compound **4b**.

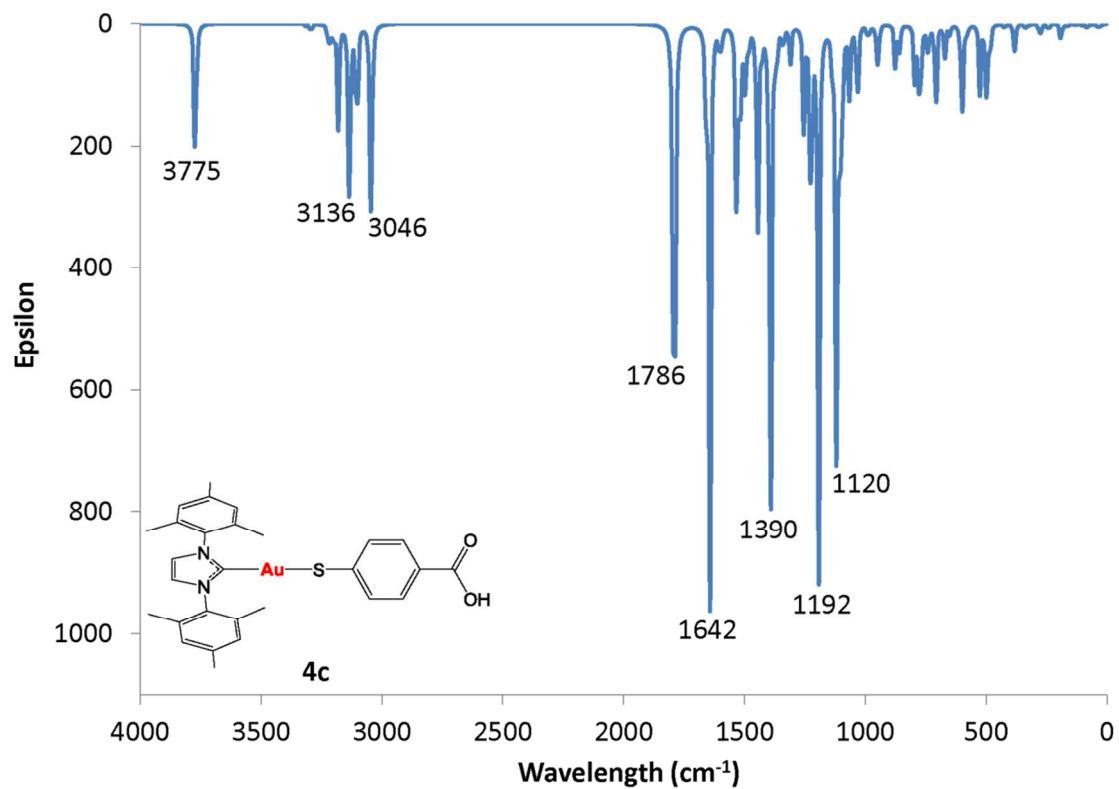

Figure S53. Calculated IR spectrum of compound **4c**.

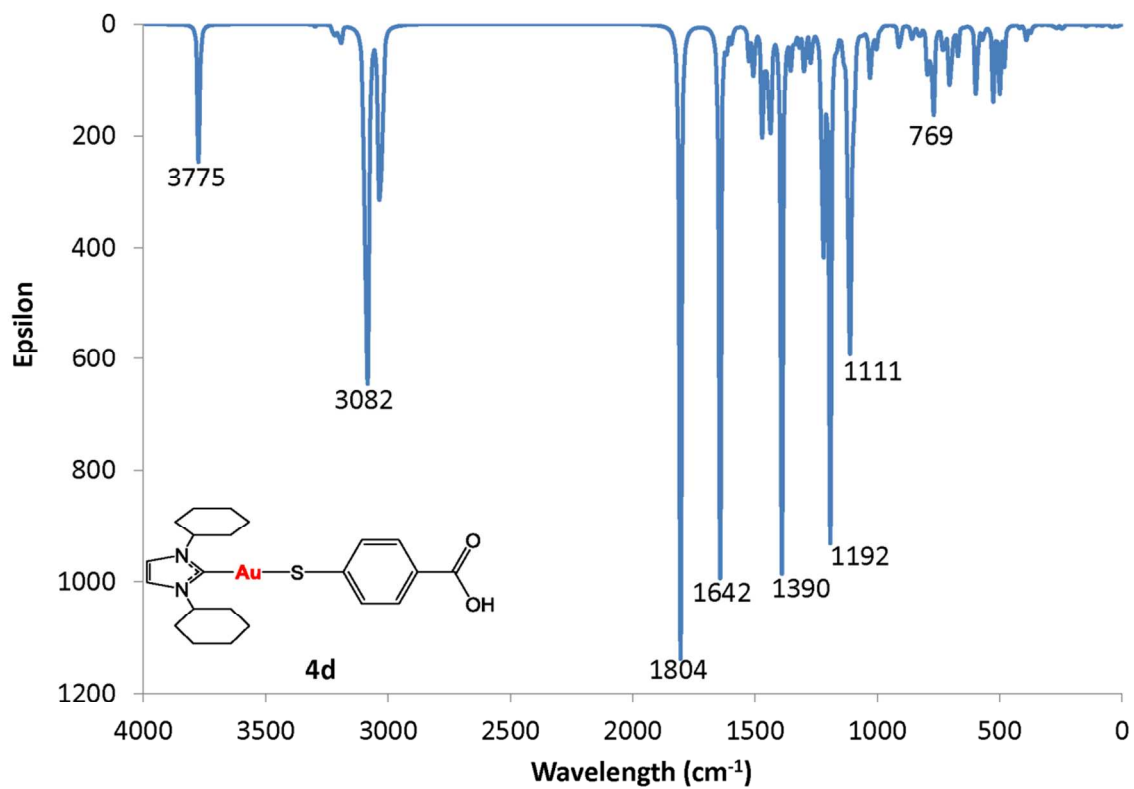

Figure S54. Calculated IR spectrum of compound **4d**.

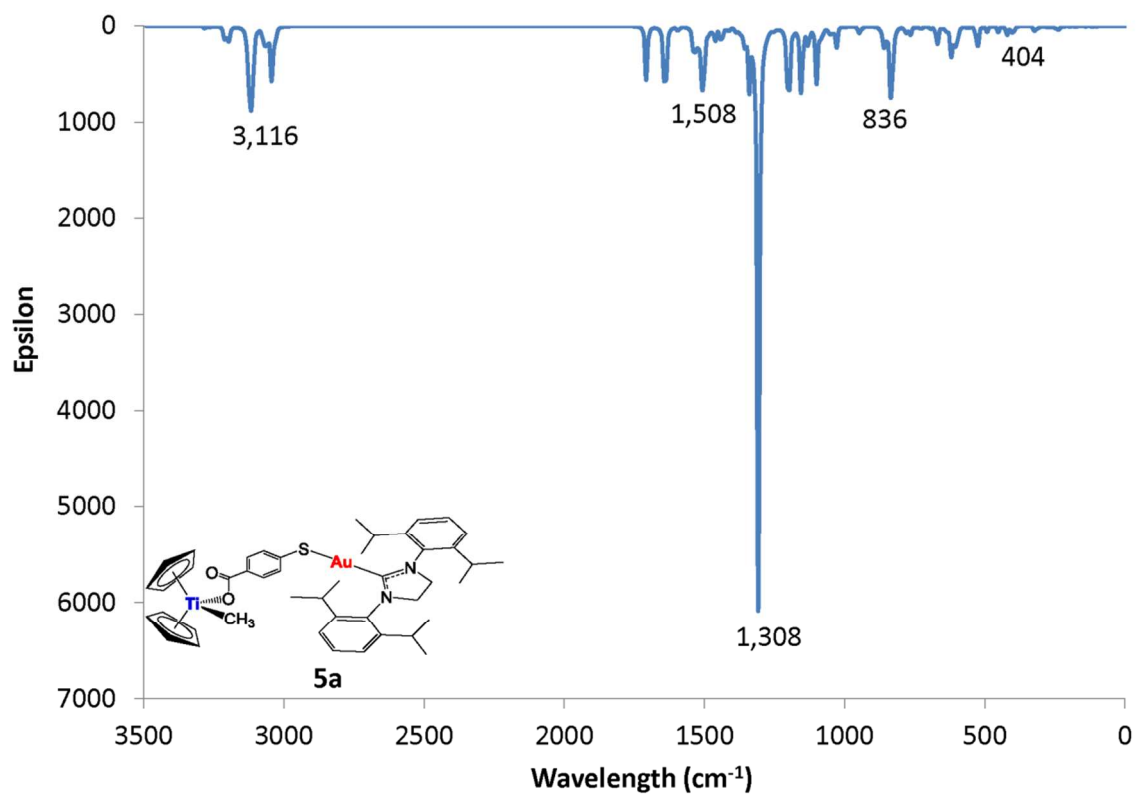

Figure S55. Calculated IR spectrum of compound **5a**.

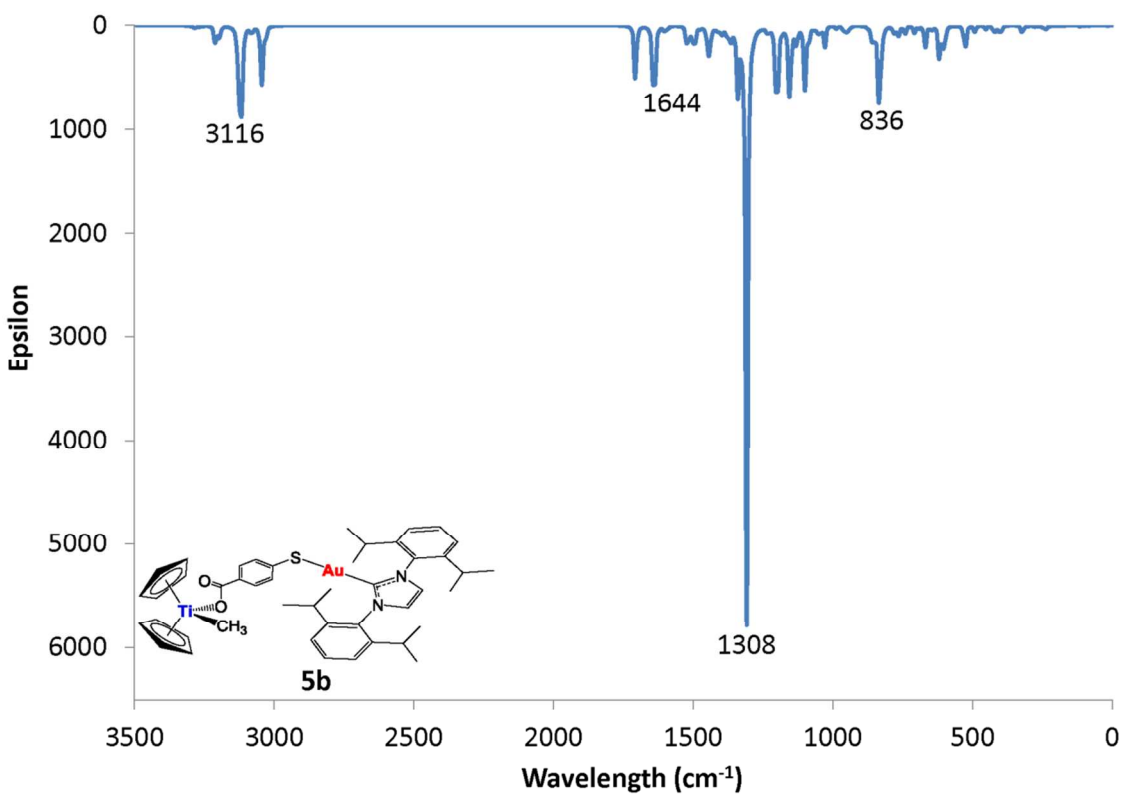

Figure S56. Calculated IR spectrum of compound **5b**.



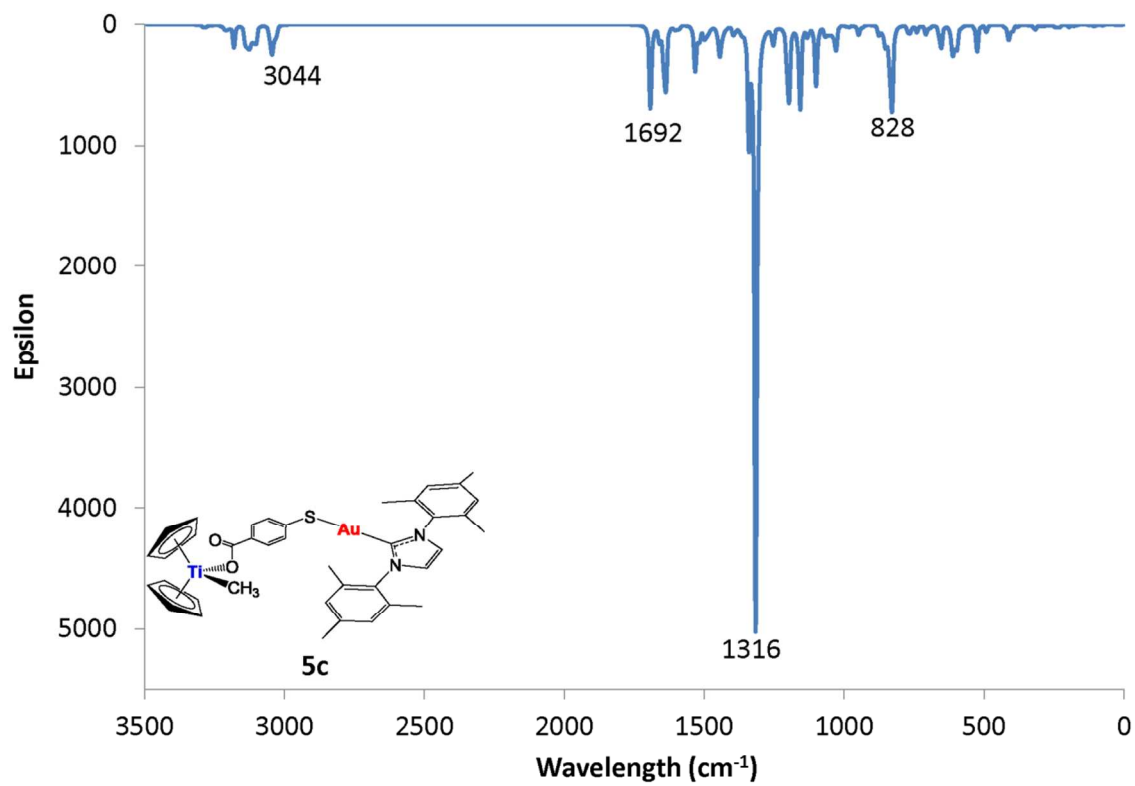

Figure S57. Calculated IR spectrum of compound **5c**.

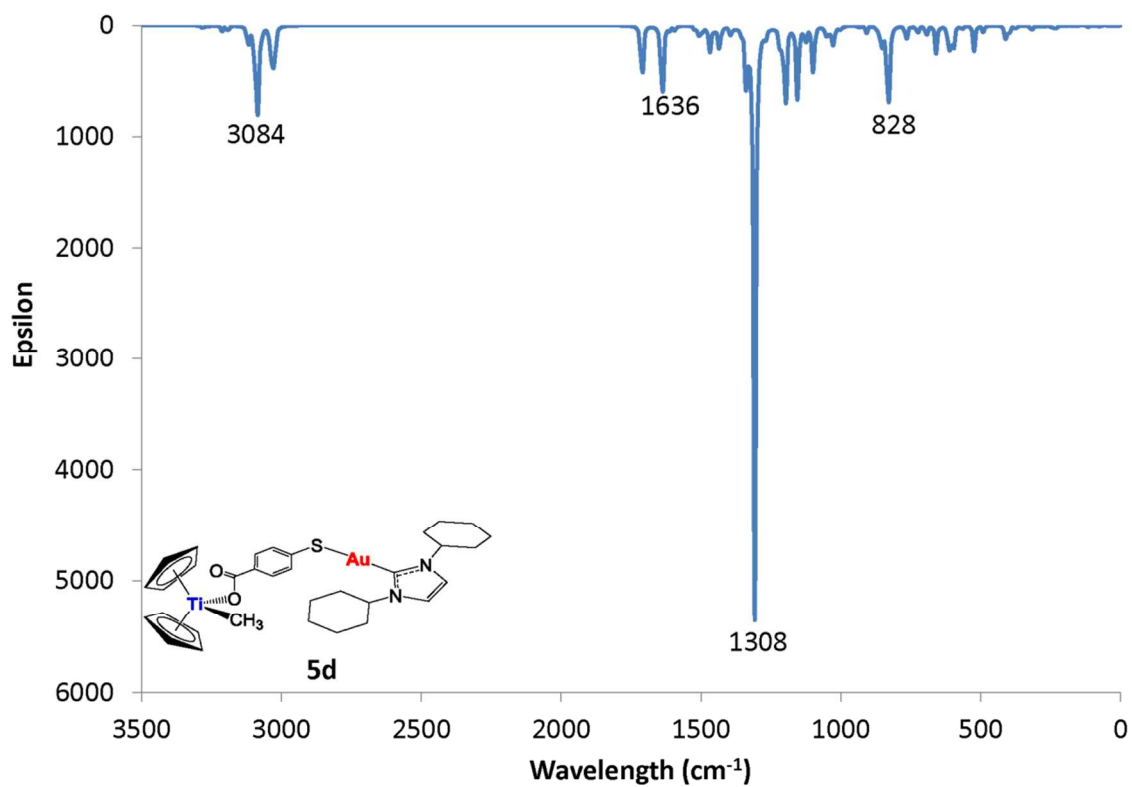

Figure S58. Calculated IR spectrum of compound **5d**.

## 8. Interaction of monometallic gold compounds (4a-d) with plasmid pBR322 DNA

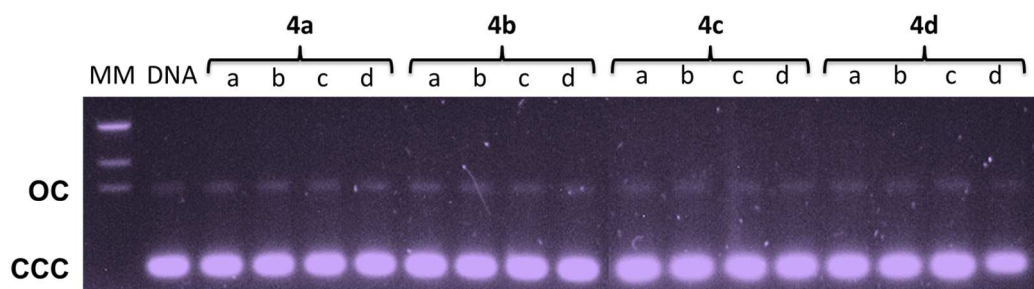

**Figure S59.** Electrophoresis mobility shift assays for monometallic Au compounds **4a-d** (see Experimental for details). DNA refers to untreated plasmid pBR322. a, b, c and d correspond to metal/DNA bp ratios of 0.25, 0.5, 1.0 and 2.0 respectively.

## 9. Migration assays with compounds 4a and 4c

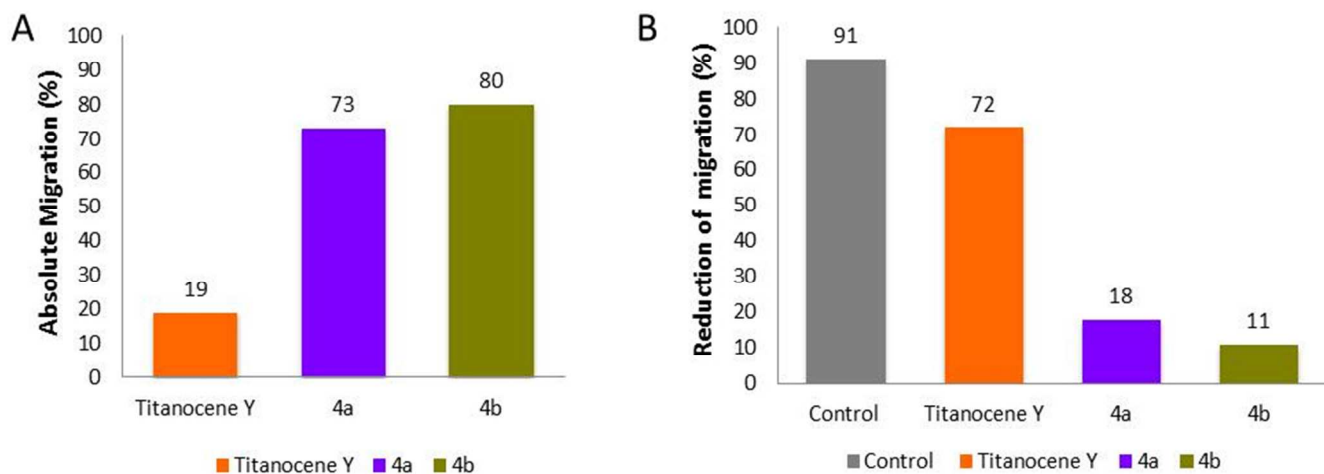

**Figure S60.** Cell migration in **4a** or **4b** treated PC3 cells. Migration of PC3 cells was assessed using a wound-healing assay following treatment with 15  $\mu$ M Titanocene Y, 15  $\mu$ M of **4a** or **4b** incubated for 24 hours (values normalized against 0.1% DMSO control). **A.** Absolute migration (%). **B.** Reduction of migration (%).

10. Inhibition of Thioredoxin Reductase (TrxR) studies of Titanocene Y at 5 and 24h

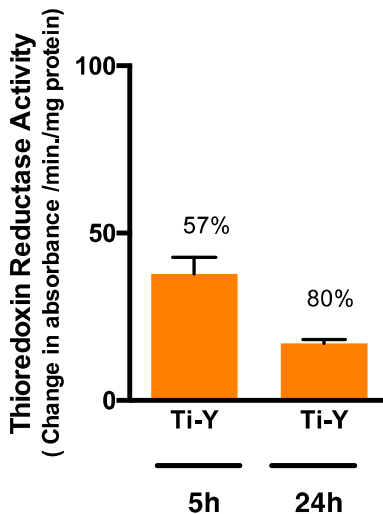

**Figure S61.** Thioredoxin reductase activity in Titanocene Y (Ti-Y) treated PC3 cells. Activity of endogenous PC3 thioredoxin reductase from soluble whole cell lysates following incubation with 15  $\mu$ M of Titanocene Y for 5 hours, and 24 hours (values normalized against 0.1% DMSO control).
